# Supplementary material for: Safety of [177Lu]Lu-NeoB treatment: a preclinical study characterizing absorbed dose and acute, early, and late organ toxicity
Source: PubMed Central journal article supplement (PMC9605926; doi:10.1007/s00259-022-05926-2), 2022-08-11
Supplement: 259_2022_5926_MOESM1_ESM.pdf [file 259_2022_5926_MOESM1_ESM.pdf]

## Supplementary Information

**Article title:** Safety of [<sup>177</sup>Lu]Lu-NeoB treatment: a preclinical study characterizing absorbed dose and acute, early, and late organ toxicity

**Journal name:** European Journal of Nuclear Medicine and Molecular Imaging (EJNMMI)

**Author names:** Eline A.M. Ruigrok, Marjolein Verhoeven, Mark W. Konijnenberg, Erik de Blois, Corrina M.A. de Ridder, Debra C. Stuurman, Luisa Bertarione, Katia Rolfo, Marion de Jong and Simone U. Dalm

**Corresponding author:** Simone U. Dalm; Erasmus MC, University Medical Center Rotterdam, Department of Radiology and Nuclear Medicine, Rotterdam, The Netherlands; s.dalm@erasmusmc.nl

## Methods

### Radiolabeling [<sup>177</sup>Lu]Lu-NeoB and [<sup>175</sup>Lu]Lu-NeoB

For lutetium-177 labeling, three solutions were prepared prior to radiolabeling:

Solution 1: 0.250 mL gentisic acid (20 mg/mL) + 1.75 mL acetate buffer (0.5 M, pH 4.5-5.0).

Solution 2: ~1 mg NeoB + 5 mL kolliphor HS 15 (2 mg/mL).

Solution 3: 3 mL ascorbic acid (22.5 mg/mL) + 1 mL acetate buffer (1 M, pH 5).

First, 0.5 mL of lutetium-177 (50 GBq/mL) was added to 1 mL of solution 1. Subsequently ~66 µL of solution 2 was added, and the mixture was left in a 95°C heating block for 7 minutes. After cooling, 500 µL of solution 3 and 420 µL MilliQ and 50 µL of DTPA (4 mM) were added. The radiochemical yield and the radiochemical purity of [<sup>177</sup>Lu]Lu-NeoB were measured to determine the quality of the labeling. The radiochemical yield was measured by instant thin-layer chromatography on silica gel (Varian) using a 1.0 M aqueous solution of ammonium acetate:methanol (40:60 V/V) as the mobile phase. The radiochemical purity of [<sup>177</sup>Lu]Lu-NeoB was measured by high-pressure liquid chromatography (HPLC) using an Alliance HPLC system (Waters) containing the W2998 PDA Detector. UV absorbance was measured at 278 nm and a peptide XB-C18 column (3.6 µm, 150 x 4.6 mm) was used with a gradient profile of 0.1% formic acid (A) and acetonitrile (B) (Table S2). Radioactivity was monitored with a system holding a NaI detector, digital multichannel analyzer and dedicated software (MetorX BV) connected to the HPLC system.

For the lutetium-175 labeling, a 1:1 molar ratio of lutetium-175 (ICP-standard 1g/L, Merck) was added to a labeling mixture containing NeoB and sodium-acetate as buffer, final pH 4.0. The mixture was left in a 95°C heating block for 20 minutes. To determine the chemical yield, UHPLC (Acquity H-Class, waters) with a W2998 PDA detector including a HSS-C18 (1.8 µm, 2.1 x 50 mm) column with a gradient profile of 20 mM ammonium acetate (A) acid and methanol (B) (Table S1) was used.

**Table S1.** UHPLC-method

| <b>Time (min)</b> | <b>A (%)</b> | <b>B (%)</b> |
|-------------------|--------------|--------------|
| 0.0-0.14          | 100          | 0            |
| 0.14-0.2          | 35           | 65           |
| 0.2-3.5           | 5            | 95           |
| 3.5-3.51          | 0            | 100          |
| 3.51-4.0          | 0            | 100          |
| 4.0-4.01          | 100          | 0            |
| 4.01-4.5          | 100          | 0            |

**Table S2.** HPLC-method

| <b>Time (min)</b> | <b>A (%)</b> | <b>B (%)</b> |
|-------------------|--------------|--------------|
| 0-2               | 85           | 15           |
| 2-9               | 60           | 40           |
| 9-11              | 60           | 40           |
| 11-11.5           | 0            | 100          |
| 11.5-13.0         | 0            | 100          |
| 13.0-13.1         | 85           | 15           |
| 13.1-15.5         | 85           | 15           |

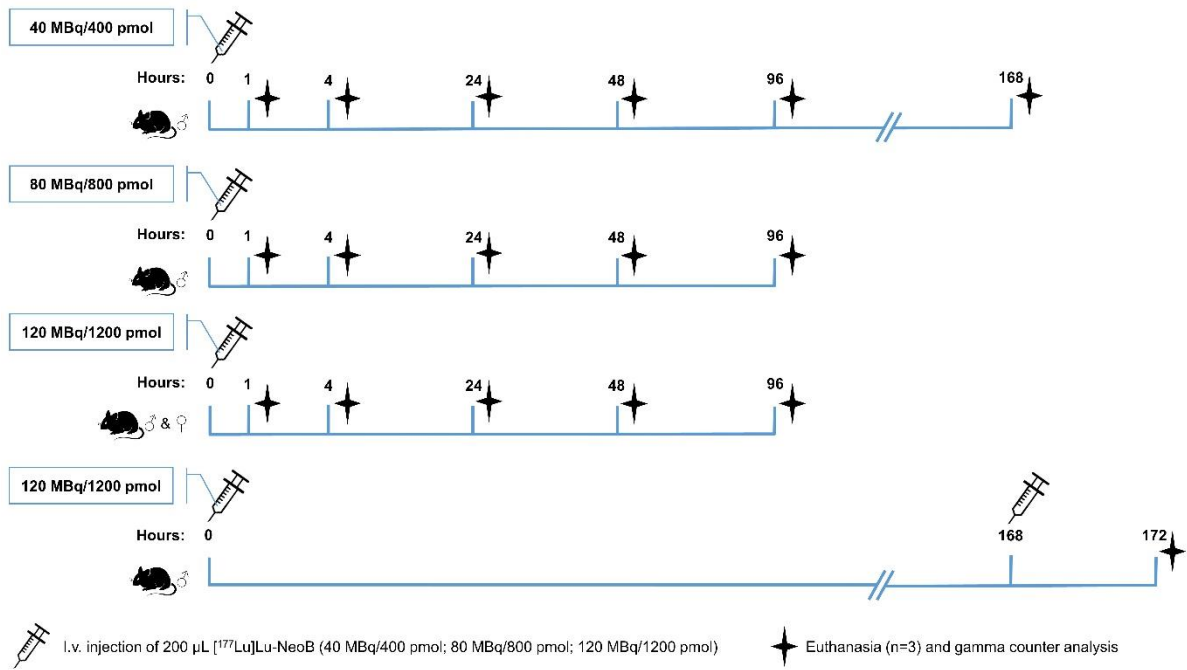

**Figure S1: Schematic overview of the biodistribution study**  
*Timelines of the biodistribution study per injected  $[^{177}\text{Lu}]\text{Lu-NeoB}$  dosage.*

**Table S3.** Biodistribution uptake values (%IA/g) of all male animals injected with 40 MBq/400 pmol [<sup>177</sup>Lu]Lu-NeoB.

|                        | 1h*       | 4h         | 24h         | 48h          | 96h          | 168h                     |
|------------------------|-----------|------------|-------------|--------------|--------------|--------------------------|
| <b>Adrenal glands</b>  | 2.77±0.63 | 1.38±0.09  | 0.31±0.17   | 0.29±0.08    | 0.16±0.01    | 0.18±0.12                |
| <b>Blood</b>           | 2.50±0.77 | 0.08±0.02  | 0.01±0.002  | 0.002±0.0004 | 0.001±0.0001 | 0.0005±0.0001            |
| <b>Brain</b>           | 0.11±0.04 | 0.02±0.02  | 0.004±0.001 | 0.003±0.0003 | 0.001±0.0002 | 0.0015±0.001             |
| <b>Heart</b>           | 0.85±0.19 | 0.09±0.01  | 0.07±0.07   | 0.02±0.003   | 0.008±0.003  | 0.01±0.0002              |
| <b>Intestine</b>       | 1.45±0.29 | 0.68±0.24  | 0.35±0.21   | 0.12±0.05    | 0.03±0.01    | 0.01±0.004               |
| <b>Kidneys</b>         | 6.01±1.24 | 1.62±0.11  | 0.57±0.05   | 0.30±0.03    | 0.06±0.01    | 0.11±0.02                |
| <b>Liver</b>           | 7.25±1.14 | 0.71±0.07  | 0.34±0.05   | 0.27±0.02    | 0.19±0.01    | 0.14±0.01                |
| <b>Lungs</b>           | 1.16±0.16 | 0.18±0.08  | 0.07±0.01   | 0.06±0.03    | 0.02±0.01    | 0.02±0.01                |
| <b>Mammary fat pad</b> | 0.74±0.39 | 0.08±0.02  | 0.03±0.01   | 0.02±0.001   | 0.01±0.002   | 0.06±0.0003              |
| <b>Muscle</b>          | 0.23±0.05 | 0.05±0.02  | 0.01±0.003  | 0.005±0.001  | 0.002±0.001  | 0.002±0.0004             |
| <b>Pancreas</b>        | 8.27±0.80 | 4.39±0.50  | 0.58±0.04   | 0.12±0.01    | 0.02±0.0004  | 0.01±0.001               |
| <b>Prostate gland</b>  | 1.34±0.07 | 0.14±0.03  | 0.03±0.01   | 0.02±0.01    | 0.04±0.05    | 0.03±0.02                |
| <b>Spleen</b>          | 0.76±0.07 | 0.20±0.03  | 0.09±0.004  | 0.07±0.01    | 0.02±0.003   | 0.05±0.01                |
| <b>Stomach</b>         | 2.36±0.66 | 0.93±0.15  | 0.44±0.05   | 0.18±0.15    | 0.10±0.03    | 0.04±0.01                |
| <b>Testes</b>          | 0.38±0.06 | 0.05±0.004 | 0.02±0.004  | 0.01±0.005   | 0.006±0.0003 | 0.01±0.0001 <sup>^</sup> |
| <b>Urinary bladder</b> | 3.19±0.81 | 2.43±1.79  | 0.17±0.14   | 0.08±0.04    | 0.04±0.03    | 0.02±0.004               |

\* Outlier excluded from dataset based on body weight (N = 2 for the 1h time point)

<sup>^</sup> Testes could not be located for one mouse due to a shrunken reproductive system (N=2 at the 168 h time point)

**Table S4.** Biodistribution uptake values (%IA/g) of male animals injected with 80 MBq/800 pmol [<sup>177</sup>Lu]Lu-NeoB.

|                        | 1h          | 4h        | 24h         | 48h          | 96h           |
|------------------------|-------------|-----------|-------------|--------------|---------------|
| <b>Adrenal glands</b>  | 1.70±0.17   | 0.81±0.09 | 0.21±0.17   | 0.20±0.001   | 0.10±0.01     |
| <b>Blood</b>           | 2.19±0.26   | 0.16±0.08 | 0.005±0.001 | 0.002±0.0001 | 0.001±0.00001 |
| <b>Brain</b>           | 0.11±0.01   | 0.07±0.10 | 0.004±0.001 | 0.003±0.001  | 0.002±0.0002  |
| <b>Heart</b>           | 0.88±0.03   | 0.14±0.05 | 0.04±0.004  | 0.03±0.002   | 0.02±0.01     |
| <b>Intestine</b>       | 1.39±0.43   | 0.71±0.24 | 0.16±0.06   | 0.12±0.04    | 0.04±0.01     |
| <b>Kidneys</b>         | 5.83±0.35   | 1.93±0.34 | 0.51±0.10   | 0.25±0.02    | 0.14±0.02     |
| <b>Liver</b>           | 5.70±0.24   | 0.91±0.19 | 0.34±0.01   | 0.28±0.02    | 0.19±0.02     |
| <b>Lungs</b>           | 1.14±0.14   | 0.29±0.14 | 0.11±0.06   | 0.10±0.04    | 0.05±0.03     |
| <b>Mammary fat pad</b> | 0.48±0.15   | 0.20±0.18 | 0.02±0.01   | 0.02±0.004   | 0.01±0.002    |
| <b>Muscle</b>          | 0.25±0.04   | 0.05±0.01 | 0.01±0.002  | 0.01±0.001   | 0.004±0.002   |
| <b>Pancreas</b>        | 4.05±0.40   | 2.33±0.37 | 0.29±0.04   | 0.08±0.05    | 0.02±0.001    |
| <b>Prostate gland</b>  | 0.66±0.30   | 0.76±0.31 | 0.05±0.04   | 0.02±0.01    | 0.02±0.02     |
| <b>Spleen</b>          | 0.62±0.10   | 0.21±0.02 | 0.10±0.001  | 0.06±0.01    | 0.05±0.01     |
| <b>Stomach</b>         | 1.05±0.05   | 0.55±0.07 | 0.25±0.02   | 0.13±0.02    | 0.06±0.01     |
| <b>Testes</b>          | 0.34±0.03   | 0.08±0.01 | 0.02±0.004  | 0.01±0.001   | 0.01±0.002    |
| <b>Urinary bladder</b> | 16.25±23.63 | 6.97±5.71 | 0.12±0.03   | 0.09±0.05    | 0.03±0.004    |

**Table S5.** Biodistribution uptake values (%IA/g) of male animals injected with 120 MBq/1200 pmol [<sup>177</sup>Lu]Lu-NeOB.

|                        | 1h        | 4h         | 4h (168h after 1st injection) | 24h          | 48h         | 96h          |
|------------------------|-----------|------------|-------------------------------|--------------|-------------|--------------|
| <b>Adrenal glands</b>  | 0.82±0.21 | 0.34±0.05  | 0.34±0.11                     | 0.16±0.06    | 0.15±0.02   | 0.10±0.003   |
| <b>Blood</b>           | 1.24±0.21 | 0.02±0.001 | 0.04±0.02                     | 0.004±0.0004 | 0.002±0.001 | 0.001±0.0002 |
| <b>Brain</b>           | 0.08±0.04 | 0.01±0.003 | 0.01±0.001                    | 0.004±0.002  | 0.004±0.003 | 0.003±0.001  |
| <b>Heart</b>           | 0.40±0.03 | 0.05±0.005 | 0.06±0.01                     | 0.03±0.004   | 0.02±0.01   | 0.02±0.004   |
| <b>Intestine</b>       | 0.73±0.12 | 0.18±0.04  | 0.13±0.07                     | 0.09±0.03    | 0.05±0.01   | 0.03±0.01    |
| <b>Kidneys</b>         | 2.86±0.24 | 0.77±0.03  | 0.89±0.07                     | 0.30±0.06    | 0.13±0.03   | 0.17±0.04    |
| <b>Liver</b>           | 3.44±0.44 | 0.29±0.02  | 0.43±0.08                     | 0.28±0.01    | 0.22±0.01   | 0.23±0.02    |
| <b>Lungs</b>           | 0.61±0.11 | 0.11±0.03  | 0.10±0.01                     | 0.11±0.05    | 0.10±0.01   | 0.17±0.05    |
| <b>Mammary fat pad</b> | 0.47±0.27 | 0.03±0.01  | 0.08±0.004                    | 0.03±0.01    | 0.01±0.001  | 0.02±0.01    |
| <b>Muscle</b>          | 0.24±0.20 | 0.02±0.003 | 0.03±0.02                     | 0.01±0.001   | 0.004±0.001 | 0.004±0.001  |
| <b>Pancreas</b>        | 1.79±0.20 | 0.76±0.06  | 0.88±0.13                     | 0.20±0.02    | 0.04±0.002  | 0.02±0.004   |
| <b>Prostate gland</b>  | 0.67±0.23 | 0.05±0.01  | 0.20±0.03                     | 0.03±0.003   | 0.02±0.01   | 0.01±0.004   |
| <b>Spleen</b>          | 0.39±0.06 | 0.09±0.002 | 0.10±0.01                     | 0.05±0.004   | 0.04±0.002  | 0.07±0.002   |
| <b>Stomach</b>         | 0.62±0.13 | 0.18±0.02  | 0.18±0.004                    | 0.13±0.02    | 0.07±0.01   | 0.05±0.004   |
| <b>Testes</b>          | 0.20±0.03 | 0.03±0.001 | 0.03±0.01                     | 0.01±0.003   | 0.01±0.002  | 0.01±0.001   |
| <b>Urinary bladder</b> | 5.93±7.80 | 2.40±3.52  | 0.54±0.58                     | 0.11±0.022   | 0.07±0.03   | 0.06±0.02    |

**Table S6.** Biodistribution uptake values (%IA/g) of female animals injected with 120 MBq/1200 pmol [<sup>177</sup>Lu]Lu-NeOB.

|                        | 1h        | 4h         | 24h         | 48h         | 96h                    |
|------------------------|-----------|------------|-------------|-------------|------------------------|
| <b>Adrenal glands</b>  | 2.00±0.38 | 0.77±0.19  | 0.41±0.14   | 0.25±0.04   | 0.14±0.02              |
| <b>Blood</b>           | 1.96±0.36 | 0.04±0.01  | 0.01±0.002  | 0.003±0.001 | 0.001±0.0002           |
| <b>Brain</b>           | 0.27±0.22 | 0.01±0.001 | 0.003±0.001 | 0.002±0.001 | 0.001±0.001            |
| <b>Heart</b>           | 0.61±0.09 | 0.06±0.004 | 0.03±0.01   | 0.01±0.002  | 0.01±0.001             |
| <b>Intestine</b>       | 0.81±0.07 | 0.26±0.03  | 0.14±0.01   | 0.08±0.03   | 0.10±0.12 <sup>^</sup> |
| <b>Kidneys</b>         | 3.84±0.56 | 1.21±0.13  | 0.74±0.04   | 0.40±0.12   | 0.11±0.04              |
| <b>Liver</b>           | 3.71±0.51 | 0.48±0.05  | 0.38±0.08   | 0.25±0.05   | 0.21±0.03              |
| <b>Lungs</b>           | 0.88±0.09 | 0.07±0.02  | 0.03±0.01   | 0.02±0.01   | 0.01±0.005             |
| <b>Mammary fat pad</b> | 0.81±0.03 | 0.09±0.03  | 0.05±0.01   | 0.05±0.04   | 0.02±0.003             |
| <b>Muscle</b>          | 0.24±0.02 | 0.02±0.002 | 0.01±0.001  | 0.004±0.002 | 0.002±0.001            |
| <b>ovaries</b>         | 0.90±0.36 | 0.09±0.02  | 0.04±0.01   | 0.02±0.01   | 0.02±0.01              |
| <b>Pancreas</b>        | 1.82±0.23 | 0.92±0.18  | 0.26±0.09   | 0.05±0.02   | 0.01±0.001             |
| <b>Spleen</b>          | 0.47±0.09 | 0.10±0.01  | 0.06±0.004  | 0.04±0.004  | 0.03±0.01              |
| <b>Stomach</b>         | 0.80±0.14 | 0.18±0.01  | 0.14±0.02   | 0.06±0.01   | 0.02±0.003             |
| <b>Urinary bladder</b> | 2.67±1.96 | 0.18±0.02  | 0.13±0.08   | 0.11±0.04   | 0.06±0.03              |

<sup>^</sup> Large SD caused by deviating organ weight of one mouse

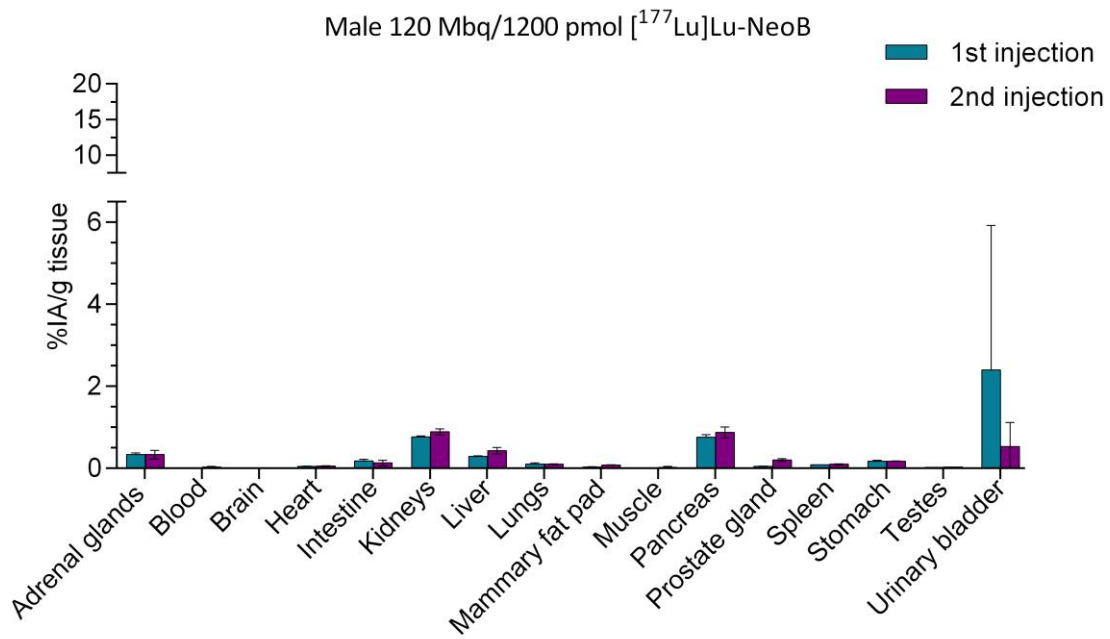

**Figure S2: Biodistribution uptake values**

*Uptake expressed in percentage of injected activity per grams of tissue (%IA/g). Comparison in uptake between animals receiving one versus 2 injections with a 7-day interval.*

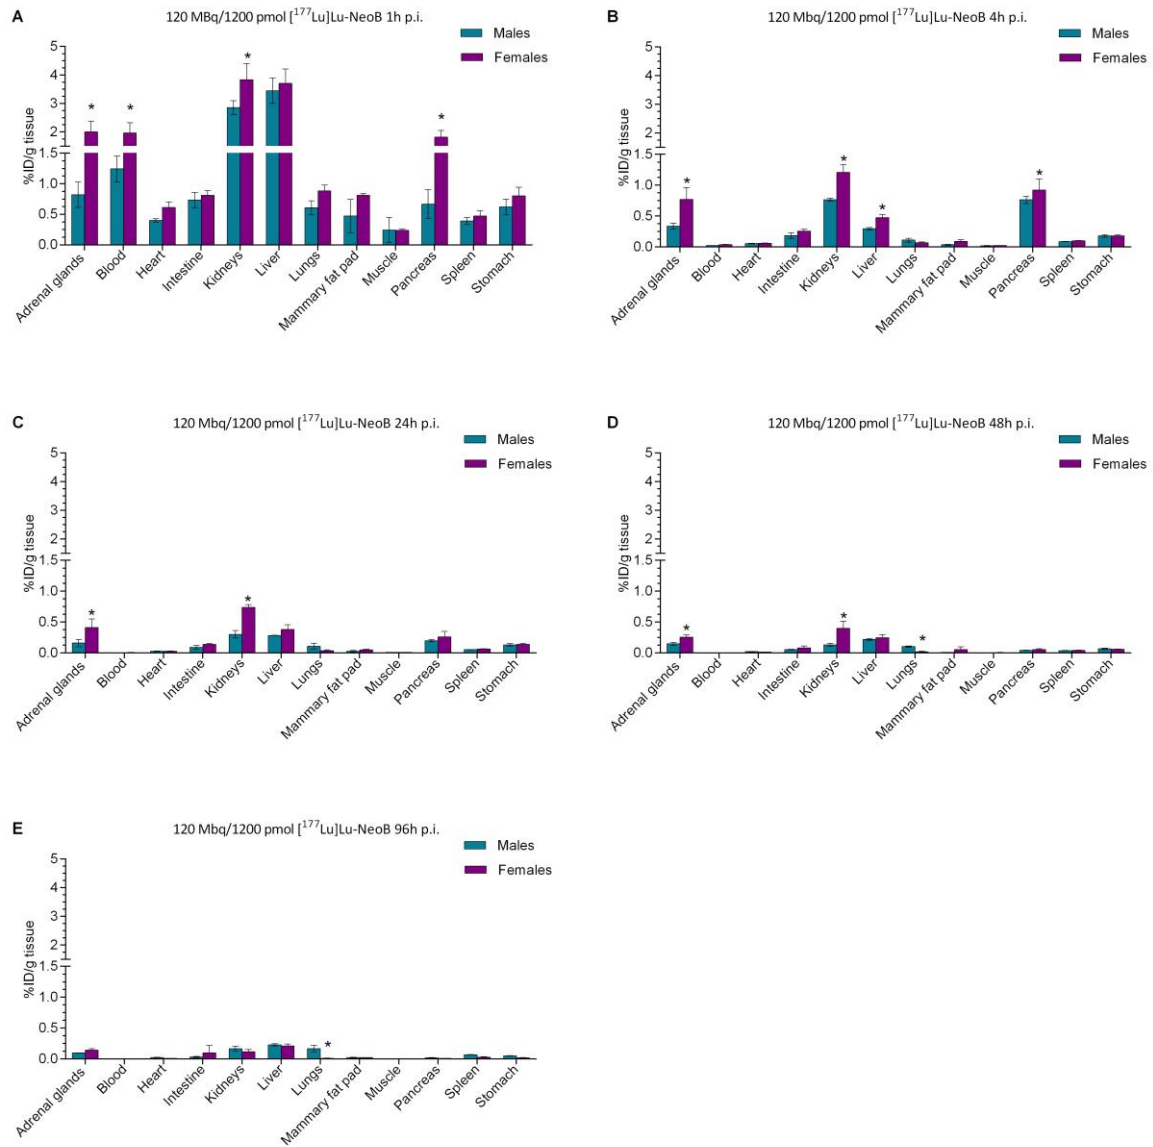

**Figure S3: Biodistribution uptake values**

*Uptake expressed in percentage of injected activity per grams of tissue (%IA/g). Comparison in uptake between male and female animals receiving 120 MBq/1200 pmol [<sup>177</sup>Lu]Lu-NeoB at (A) 1h, (B) 4h, (C) 24h, (D) 48h and (E) 96h after injection. Error bars represent the standard deviation.*

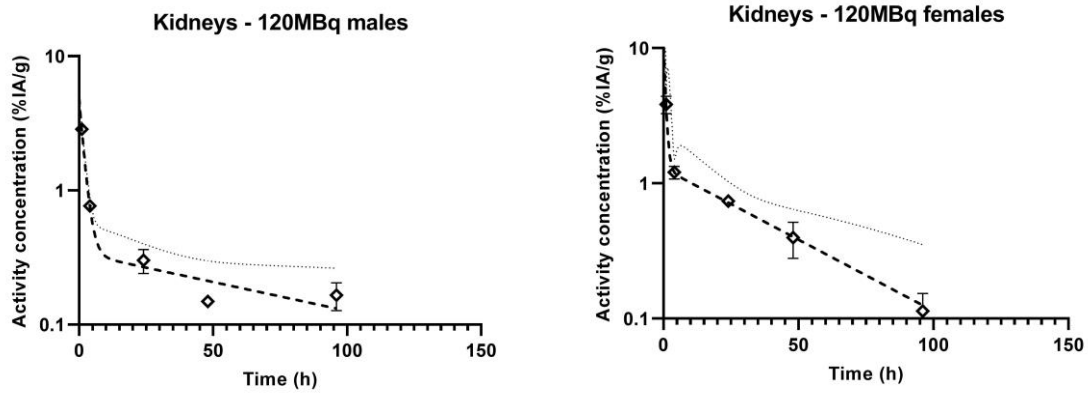

**Figure S4: Pharmacokinetic modeling of [<sup>177</sup>Lu]Lu-NeoB kidney clearance**  
*Comparison in kidney clearance between male (left) and female (right) animals receiving 120 MBq/1200 pmol [<sup>177</sup>Lu]Lu-NeoB. The exponential fit was performed using a two-phase decay model with an  $R^2$  of 0.95 for males and 0.97 for females.*



**Table S7.** Microscopic observations during histopathological evaluation of organs/tissues of male mice sacrificed 5 weeks after the first injection. A 5-point grading scale was used: 1. Minimal change, 2. Mild change, 3. Moderate change, 4. Marked change, 5. Severe change.

| Sex                                           | Males           |     |   |   |   |                 |     |   |   |   |                   |     |   |     |   |                   |   |   |     |   |                   |     |   |   |   |
|-----------------------------------------------|-----------------|-----|---|---|---|-----------------|-----|---|---|---|-------------------|-----|---|-----|---|-------------------|---|---|-----|---|-------------------|-----|---|---|---|
| Group                                         | Control group 1 |     |   |   |   | Control group 2 |     |   |   |   | Treatment group 1 |     |   |     |   | Treatment group 2 |   |   |     |   | Treatment group 3 |     |   |   |   |
| N                                             | 3               |     |   |   |   | 3               |     |   |   |   | 3                 |     |   |     |   | 3                 |   |   |     |   | 3                 |     |   |   |   |
| Score                                         | 1               | 2   | 3 | 4 | 5 | 1               | 2   | 3 | 4 | 5 | 1                 | 2   | 3 | 4   | 5 | 1                 | 2 | 3 | 4   | 5 | 1                 | 2   | 3 | 4 | 5 |
| Adrenal glands – Subcapsular cell hyperplasia |                 | 1/3 |   |   |   | 1/3             | 1/3 |   |   |   | 1/3               |     |   |     |   |                   |   |   |     |   |                   |     |   |   |   |
| Adrenal glands – accessory cortical tissue    |                 |     |   |   |   | 1/3             |     |   |   |   |                   |     |   |     |   |                   |   |   |     |   |                   |     |   |   |   |
| Urinary bladder – inflammatory cell foci      |                 |     |   |   |   |                 |     |   |   |   |                   |     |   |     |   |                   |   |   |     |   | 3/3               |     |   |   |   |
| Urinary bladder – urothelium vacuolation      |                 |     |   |   |   |                 |     |   |   |   |                   |     |   |     |   |                   |   |   |     |   | 2/3               | 1/3 |   |   |   |
| Urinary bladder – mineralization              |                 |     |   |   |   |                 |     |   |   |   |                   |     |   |     |   |                   |   |   |     |   |                   | 1/3 |   |   |   |
| Testes – germ cell depletion                  |                 |     |   |   |   |                 |     |   |   |   |                   | 1/3 |   |     |   | 1/3               |   |   |     |   | 1/3               |     |   |   |   |
| Thyroid gland – ectopic thymus                |                 |     |   |   |   |                 |     |   |   |   |                   |     |   | 1/3 |   |                   |   |   | 1/3 |   |                   |     |   |   |   |
| Spleen – extramedullary haematopoiesis        |                 |     |   |   |   |                 | 1/3 |   |   |   |                   | 2/3 |   |     |   |                   |   |   |     |   |                   |     |   |   |   |
| Pancreas – acinar cell degeneration           |                 |     |   |   |   |                 |     |   |   |   | 1/3               |     |   |     |   |                   |   |   |     |   |                   |     |   |   |   |
| Pancreas – mineralization                     |                 |     |   |   |   |                 |     |   |   |   |                   |     |   |     |   |                   |   |   |     |   |                   | 1/3 |   |   |   |
| Prostate gland – inflammatory cell foci       |                 |     |   |   |   |                 |     |   |   |   |                   |     |   |     |   |                   |   |   |     |   | 2/3               |     |   |   |   |
| Heart – inflammatory cell foci                |                 |     |   |   |   |                 |     |   |   |   |                   |     |   |     |   |                   |   |   |     |   |                   | 1/3 |   |   |   |

**Table S8.** Microscopic observations during histopathological evaluation of organs/tissues of female mice sacrificed 5 weeks after the first injection. A 5-point grading scale was used: 1. Minimal change, 2. Mild change, 3. Moderate change, 4. Marked change, 5. Severe change.

| Sex                                           | Females         |   |   |   |   |                 |   |   |     |   |                   |     |   |   |   |                   |     |   |   |   |                   |     |   |   |     |
|-----------------------------------------------|-----------------|---|---|---|---|-----------------|---|---|-----|---|-------------------|-----|---|---|---|-------------------|-----|---|---|---|-------------------|-----|---|---|-----|
| Group                                         | Control group 1 |   |   |   |   | Control group 2 |   |   |     |   | Treatment group 1 |     |   |   |   | Treatment group 2 |     |   |   |   | Treatment group 3 |     |   |   |     |
| N                                             | 3               |   |   |   |   | 3               |   |   |     |   | 3                 |     |   |   |   | 3                 |     |   |   |   | 3                 |     |   |   |     |
| Score                                         | 1               | 2 | 3 | 4 | 5 | 1               | 2 | 3 | 4   | 5 | 1                 | 2   | 3 | 4 | 5 | 1                 | 2   | 3 | 4 | 5 | 1                 | 2   | 3 | 4 | 5   |
| Adrenal glands – Subcapsular cell hyperplasia | 1/3             |   |   |   |   | 2/3             |   |   |     |   | 1/3               | 1/3 |   |   |   | 3/3               |     |   |   |   | 1/3               |     |   |   |     |
| Urinary bladder – inflammatory cell foci      |                 |   |   |   |   |                 |   |   |     |   | 1/3               |     |   |   |   | 1/3               | 2/3 |   |   |   | 1/3               | 2/3 |   |   |     |
| Urinary bladder – urothelium vacuolation      |                 |   |   |   |   |                 |   |   |     |   |                   |     |   |   |   | 2/3               | 1/3 |   |   |   | 1/3               | 2/3 |   |   |     |
| Spleen – extramedullary haematopoiesis        |                 |   |   |   |   |                 |   |   |     |   |                   | 2/3 |   |   |   |                   |     |   |   |   |                   | 1/3 |   |   |     |
| Thyroid gland – follicular cyst/s             |                 |   |   |   |   |                 |   |   |     |   |                   |     |   |   |   |                   |     |   |   |   | 1/3               |     |   |   |     |
| Liver – inflammatory cell foci                | 1/3             |   |   |   |   |                 |   |   |     |   |                   |     |   |   |   | 1/3               |     |   |   |   | 1/3               |     |   |   |     |
| Brain - artifacts                             |                 |   |   |   |   |                 |   |   | 1/3 |   |                   |     |   |   |   |                   |     |   |   |   |                   |     |   |   | 1/3 |

**Table S9.** Microscopic observations during histopathological evaluation of organs/tissues of male mice sacrificed 19 weeks after the first injection. A 5-point grading scale was used: 1. Minimal change, 2. Mild change, 3. Moderate change, 4. Marked change, 5. Severe change.

| Sex                                           | Males           |     |   |   |   |                 |     |   |   |   |                   |     |   |   |   |                   |     |     |     |   |                   |     |     |   |     |
|-----------------------------------------------|-----------------|-----|---|---|---|-----------------|-----|---|---|---|-------------------|-----|---|---|---|-------------------|-----|-----|-----|---|-------------------|-----|-----|---|-----|
| Group                                         | Control group 1 |     |   |   |   | Control group 2 |     |   |   |   | Treatment group 1 |     |   |   |   | Treatment group 2 |     |     |     |   | Treatment group 3 |     |     |   |     |
| N                                             | 3               |     |   |   |   | 3               |     |   |   |   | 3                 |     |   |   |   | 3                 |     |     |     |   | 3                 |     |     |   |     |
| Score                                         | 1               | 2   | 3 | 4 | 5 | 1               | 2   | 3 | 4 | 5 | 1                 | 2   | 3 | 4 | 5 | 1                 | 2   | 3   | 4   | 5 | 1                 | 2   | 3   | 4 | 5   |
| Adrenal glands – Subcapsular cell hyperplasia | 2/3             |     |   |   |   | 2/3             |     |   |   |   | 1/3               | 1/3 |   |   |   | 1/3               | 1/3 |     |     |   | 2/3               | 1/3 |     |   |     |
| Adrenal glands – accessory cortical tissue    | 1/3             |     |   |   |   |                 |     |   |   |   |                   |     |   |   |   |                   |     |     |     |   |                   |     |     |   |     |
| Urinary bladder – inflammatory cell foci      |                 |     |   |   |   |                 |     |   |   |   |                   |     |   |   |   | 2/3               |     |     |     |   |                   |     |     |   |     |
| Urinary bladder – urothelium vacuolation      |                 |     |   |   |   |                 |     |   |   |   |                   |     |   |   |   | 3/3               |     |     |     |   | 1/3               |     |     |   |     |
| Urinary bladder – proteinaceous plug          |                 | 1/3 |   |   |   |                 | 1/3 |   |   |   |                   |     |   |   |   |                   |     |     |     |   |                   |     |     |   |     |
| Testes – germ cell depletion                  |                 |     |   |   |   |                 |     |   |   |   | 2/3               |     |   |   |   |                   |     |     |     |   |                   |     |     |   |     |
| Thyroid gland – ectopic thymus                |                 |     |   |   |   |                 |     |   |   |   | 1/3               |     |   |   |   |                   |     |     |     |   | 1/3               |     |     |   |     |
| Spleen – extramedullary haematopoiesis        |                 |     |   |   |   |                 |     |   |   |   |                   | 1/3 |   |   |   |                   |     |     |     |   |                   | 1/3 |     |   |     |
| Pancreas – inflammatory cell foci             |                 | 3/3 |   |   |   | 1/3             |     |   |   |   |                   |     |   |   |   |                   | 2/3 |     |     |   |                   |     |     |   |     |
| Kidneys – hydronephrosis                      |                 |     |   |   |   |                 |     |   |   |   |                   |     |   |   |   |                   |     | 1/3 | 2/3 |   |                   |     |     |   | 2/3 |
| Kidneys – nephropathy                         |                 |     |   |   |   |                 |     |   |   |   |                   |     |   |   |   |                   |     | 1/3 |     |   |                   |     | 1/3 |   |     |

**Table S10.** Microscopic observations during histopathological evaluation of organs/tissues of female mice sacrificed 19 weeks after the first injection. A 5-point grading scale was used: 1. Minimal change, 2. Mild change, 3. Moderate change, 4. Marked change, 5. Severe change.

| Sex                                           | Females         |     |   |   |   |                 |     |   |   |   |                   |     |   |     |   |                   |     |   |   |   |                   |     |     |     |   |
|-----------------------------------------------|-----------------|-----|---|---|---|-----------------|-----|---|---|---|-------------------|-----|---|-----|---|-------------------|-----|---|---|---|-------------------|-----|-----|-----|---|
| Group                                         | Control group 1 |     |   |   |   | Control group 2 |     |   |   |   | Treatment group 1 |     |   |     |   | Treatment group 2 |     |   |   |   | Treatment group 3 |     |     |     |   |
| N                                             | 3               |     |   |   |   | 3               |     |   |   |   | 3                 |     |   |     |   | 3                 |     |   |   |   | 3                 |     |     |     |   |
| Score                                         | 1               | 2   | 3 | 4 | 5 | 1               | 2   | 3 | 4 | 5 | 1                 | 2   | 3 | 4   | 5 | 1                 | 2   | 3 | 4 | 5 | 1                 | 2   | 3   | 4   | 5 |
| Adrenal glands – Subcapsular cell hyperplasia | 2/3             | 1/3 |   |   |   | 1/3             | 2/3 |   |   |   | 1/3               | 2/3 |   |     |   | 2/3               | 1/3 |   |   |   | 1/3               | 2/3 |     |     |   |
| Urinary bladder – inflammatory cell foci      |                 |     |   |   |   |                 |     |   |   |   | 2/3               | 1/3 |   |     |   | 2/3               |     |   |   |   | 1/3               | 1/3 | 1/3 |     |   |
| Urinary bladder – urothelium vacuolation      |                 |     |   |   |   |                 |     |   |   |   | 2/3               |     |   |     |   | 2/3               | 1/3 |   |   |   | 1/3               | 1/3 |     |     |   |
| Spleen – extramedullary haematopoiesis        |                 |     |   |   |   |                 |     |   |   |   |                   |     |   |     |   |                   | 1/3 |   |   |   |                   |     |     |     |   |
| Pancreas – inflammatory cell foci             | 1/3             |     |   |   |   |                 |     |   |   |   | 2/3               |     |   |     |   | 1/3               |     |   |   |   | 1/3               | 1/3 |     |     |   |
| Kidneys – hydronephrosis                      |                 |     |   |   |   |                 |     |   |   |   |                   |     |   | 1/3 |   |                   |     |   |   |   |                   |     |     | 3/3 |   |
| Kidneys – nephropathy                         |                 |     |   |   |   |                 |     |   |   |   |                   |     |   |     |   |                   |     |   |   |   |                   | 1/3 |     |     |   |
| Liver – inflammatory cell foci                | 1/3             |     |   |   |   |                 |     |   |   |   | 1/3               | 1/3 |   |     |   | 2/3               |     |   |   |   |                   |     |     |     |   |
| Ureter(s) - dilatation                        |                 |     |   |   |   |                 |     |   |   |   |                   |     |   |     |   |                   |     |   |   |   |                   | 1/3 |     |     |   |

**Table S11.** Microscopic observations during histopathological evaluation of organs/tissues of male mice sacrificed 43 weeks after the first injection. A 5-point grading scale was used: 1. Minimal change, 2. Mild change, 3. Moderate change, 4. Marked change, 5. Severe change.

| Sex                                           | Males           |     |   |     |   |                 |     |     |   |   |                   |     |   |   |   |                   |     |     |     |   |                   |     |     |     |   |
|-----------------------------------------------|-----------------|-----|---|-----|---|-----------------|-----|-----|---|---|-------------------|-----|---|---|---|-------------------|-----|-----|-----|---|-------------------|-----|-----|-----|---|
| Group                                         | Control group 1 |     |   |     |   | Control group 2 |     |     |   |   | Treatment group 1 |     |   |   |   | Treatment group 2 |     |     |     |   | Treatment group 3 |     |     |     |   |
| N                                             | 4               |     |   |     |   | 4               |     |     |   |   | 3                 |     |   |   |   | 4                 |     |     |     |   | 4                 |     |     |     |   |
| Score                                         | 1               | 2   | 3 | 4   | 5 | 1               | 2   | 3   | 4 | 5 | 1                 | 2   | 3 | 4 | 5 | 1                 | 2   | 3   | 4   | 5 | 1                 | 2   | 3   | 4   | 5 |
| Adrenal glands – Subcapsular cell hyperplasia | 1/4             | 3/4 |   |     |   | 3/4             | 1/4 |     |   |   | 2/3               | 1/3 |   |   |   | 2/4               | 1/4 | 1/4 |     |   | 3/4               | 1/4 |     |     |   |
| Urinary bladder – inflammatory cell foci      |                 |     |   |     |   |                 |     |     |   |   | 1/3               |     |   |   |   | 2/4               | 1/4 |     |     |   |                   |     |     |     |   |
| Urinary bladder – urothelium vacuolation      |                 |     |   |     |   |                 |     |     |   |   |                   |     |   |   |   | 1/4               |     |     |     |   |                   |     |     |     |   |
| Testes – germ cell depletion                  | 1/4             |     |   |     |   | 1/4             |     |     |   |   |                   |     |   |   |   |                   |     |     |     |   | 1/4               |     |     |     |   |
| Pancreas – inflammatory cell foci             | 1/4             |     |   |     |   |                 | 1/4 |     |   |   | 1/3               | 2/3 |   |   |   |                   | 2/4 |     |     |   | 2/4               |     |     |     |   |
| Pancreas – acinar cell degeneration           |                 |     |   |     |   |                 |     |     |   |   | 1/3               |     |   |   |   |                   |     |     |     |   |                   |     |     |     |   |
| Kidneys – hydronephrosis                      |                 |     |   | 1/4 |   |                 |     |     |   |   |                   |     |   |   |   |                   |     |     | 2/4 |   |                   |     |     | 3/4 |   |
| Kidneys – nephropathy                         |                 |     |   |     |   |                 |     |     |   |   | 2/3               |     |   |   |   | 1/4               | 1/4 |     |     |   | 1/4               |     |     |     |   |
| Kidneys – inflammatory cell foci              |                 |     |   |     |   | 1/4             |     |     |   |   | 1/3               |     |   |   |   |                   |     |     |     |   |                   |     |     |     |   |
| Kidneys – Cyst/s                              |                 |     |   |     |   |                 |     | 1/4 |   |   |                   |     |   |   |   |                   |     |     |     |   |                   | 1/4 |     |     |   |
| Lungs – B-adenoma                             | 1/4             |     |   |     |   |                 |     |     |   |   |                   |     |   |   |   |                   |     |     |     |   |                   |     |     |     |   |
| Skin – inflammatory cell foci                 |                 |     |   |     |   |                 |     |     |   |   | 1/3               |     |   |   |   |                   |     |     |     |   | 1/4               |     |     |     |   |
| Skin – scab formulation                       |                 |     |   |     |   |                 |     |     |   |   | 1/3               |     |   |   |   |                   |     |     |     |   |                   |     |     |     |   |
| Liver – inflammatory cell foci                |                 |     |   |     |   |                 |     |     |   |   |                   |     |   |   |   |                   |     |     |     |   | 2/4               |     |     |     |   |
| Ureter(s) - dilation                          |                 |     |   |     |   |                 |     |     |   |   |                   |     |   |   |   |                   |     |     |     |   |                   |     | 1/4 |     |   |
| Epididymides – spermatic granuloma            |                 |     |   |     |   |                 |     |     |   |   |                   |     |   |   |   |                   |     |     |     |   |                   |     | 1/4 |     |   |

**Table S12.** Microscopic observations during histopathological evaluation of organs/tissues of female mice sacrificed 43 weeks after the first injection. A 5-point grading scale was used: 1. Minimal change, 2. Mild change, 3. Moderate change, 4. Marked change, 5. Severe change.

| Sex                                           | Females         |     |   |   |   |                 |     |   |     |   |                   |     |     |     |   |                   |     |     |   |     |                   |     |     |     |     |
|-----------------------------------------------|-----------------|-----|---|---|---|-----------------|-----|---|-----|---|-------------------|-----|-----|-----|---|-------------------|-----|-----|---|-----|-------------------|-----|-----|-----|-----|
| Group                                         | Control group 1 |     |   |   |   | Control group 2 |     |   |     |   | Treatment group 1 |     |     |     |   | Treatment group 2 |     |     |   |     | Treatment group 3 |     |     |     |     |
| N                                             | 4               |     |   |   |   | 4               |     |   |     |   | 3                 |     |     |     |   | 4                 |     |     |   |     | 4                 |     |     |     |     |
| Score                                         | 1               | 2   | 3 | 4 | 5 | 1               | 2   | 3 | 4   | 5 | 1                 | 2   | 3   | 4   | 5 | 1                 | 2   | 3   | 4 | 5   | 1                 | 2   | 3   | 4   | 5   |
| Adrenal glands – Subcapsular cell hyperplasia |                 | 4/4 |   |   |   | 1/4             | 2/4 |   |     |   |                   | 2/3 | 1/3 |     |   |                   | 3/4 | 1/4 |   |     |                   | 4/4 |     |     |     |
| Urinary bladder – inflammatory cell foci      |                 |     |   |   |   |                 |     |   |     |   | 1/3               |     |     |     |   | 1/4               |     |     |   |     |                   |     |     |     |     |
| Urinary bladder – urothelium vacuolation      |                 |     |   |   |   |                 |     |   |     |   | 1/3               |     |     |     |   | 1/4               |     |     |   |     |                   |     |     |     |     |
| Urinary bladder – mineralization              |                 |     |   |   |   |                 |     |   |     |   |                   |     |     |     |   |                   |     |     |   |     |                   | 1/4 |     |     |     |
| Spleen – extramedullary haematopoiesis        |                 | 1/4 |   |   |   |                 |     |   |     |   |                   |     |     |     |   |                   |     |     |   |     |                   |     |     |     |     |
| Pancreas – inflammatory cell foci             |                 |     |   |   |   |                 | 1/4 |   |     |   |                   |     |     |     |   |                   |     |     |   |     |                   | 1/4 |     |     |     |
| Kidneys – hydronephrosis                      |                 |     |   |   |   |                 |     |   |     |   |                   |     |     |     |   |                   |     |     |   | 1/4 |                   |     |     | 1/4 | 1/4 |
| Kidneys – nephropathy                         |                 |     |   |   |   |                 |     |   |     |   |                   |     |     |     |   |                   |     |     |   | 1/4 |                   |     |     |     |     |
| Lungs – alveolar epithelialization            |                 |     |   |   |   |                 |     |   |     |   |                   |     |     |     |   |                   | 1/4 |     |   |     |                   |     |     |     |     |
| Lungs – B-adenoma                             |                 |     |   |   |   |                 |     |   |     |   |                   |     |     |     |   |                   |     |     |   |     |                   |     |     |     | 1/4 |
| Liver – inflammatory cell foci                |                 |     |   |   |   | 1/4             |     |   |     |   |                   |     |     |     |   | 3/4               |     |     |   |     |                   |     |     |     |     |
| Ureter(s) - dilation                          |                 |     |   |   |   |                 |     |   |     |   |                   |     |     |     |   |                   |     |     |   |     |                   |     | 1/4 |     |     |
| Ovaries – atrophy                             |                 |     |   |   |   |                 |     |   |     |   |                   |     |     | 3/3 |   |                   |     |     |   | 3/4 |                   |     |     | 4/4 |     |
| Uterus – endometrial hyperplasia              |                 |     |   |   |   |                 |     |   | 1/4 |   |                   |     |     | 3/3 |   |                   |     |     |   |     |                   |     |     |     |     |

**Table S13.** Hematologic parameters in male mice. Values represent the mean  $\pm$  SD. The reference values are based on the baseline (-1 wk) measurements. Asterisks show the significance level with \*:  $p \leq 0.05$ .

C1/C2/T1/T2/T3 Significant difference as compared with e.g. control group 1 (C1) at the same time point.

^ Outlier excluded from dataset (N = N-1)

| Males                   | N  | WBC ( $10^3/\text{mm}^3$ )     | RBC ( $10^6/\text{mm}^3$ )         | HGB (g/dl)                      | HCT (%)                             |
|-------------------------|----|--------------------------------|------------------------------------|---------------------------------|-------------------------------------|
| Reference value         | 50 | 7.68 $\pm$ 1.85                | 9.21 $\pm$ 0.66                    | 16.41 $\pm$ 0.84                | 44.49 $\pm$ 3.06                    |
| Control group 1: 5 wk   | 10 | 8.63 $\pm$ 1.77 <sup>T3*</sup> | 8.92 $\pm$ 0.29 <sup>^</sup>       | 16.52 $\pm$ 0.80                | 42.52 $\pm$ 1.44 <sup>^</sup>       |
| 11 wk                   | 7  | 8.38 $\pm$ 1.06 <sup>^</sup>   | 9.40 $\pm$ 0.25                    | 17.21 $\pm$ 0.41                | 44.11 $\pm$ 1.11                    |
| 19 wk                   | 7  | 11.17 $\pm$ 5.92               | 9.42 $\pm$ 0.30                    | 16.80 $\pm$ 0.65                | 44.81 $\pm$ 1.69                    |
| 30 wk                   | 4  | 10.18 $\pm$ 3.47               | 9.21 $\pm$ 0.37                    | 17.13 $\pm$ 0.85                | 44.30 $\pm$ 1.59                    |
| 43 wk                   | 4  | 5.98 $\pm$ 1.18                | 8.66 $\pm$ 0.19                    | 15.63 $\pm$ 0.59                | 41.05 $\pm$ 0.74                    |
| Control group 2: 5 wk   | 10 | 7.67 $\pm$ 1.50                | 9.03 $\pm$ 0.65                    | 16.45 $\pm$ 0.49                | 43.00 $\pm$ 3.33                    |
| 11 wk                   | 7  | 8.37 $\pm$ 2.67                | 9.13 $\pm$ 1.47                    | 17.11 $\pm$ 0.85                | 44.96 $\pm$ 3.10                    |
| 19 wk                   | 7  | 9.53 $\pm$ 2.84                | 8.64 $\pm$ 0.42 <sup>T1*/T2*</sup> | 15.59 $\pm$ 0.31 <sup>T2*</sup> | 40.80 $\pm$ 1.97 <sup>T1*/T2*</sup> |
| 30 wk                   | 4  | 9.80 $\pm$ 2.25                | 9.35 $\pm$ 0.34                    | 17.20 $\pm$ 0.43                | 44.90 $\pm$ 1.44                    |
| 43 wk                   | 4  | 6.70 $\pm$ 2.71                | 8.79 $\pm$ 0.34                    | 15.38 $\pm$ 0.75                | 41.88 $\pm$ 1.83                    |
| Treatment group 1: 5 wk | 10 | 8.08 $\pm$ 2.38                | 8.96 $\pm$ 0.30                    | 16.78 $\pm$ 0.48 <sup>^</sup>   | 42.96 $\pm$ 1.20                    |
| 11 wk                   | 7  | 8.53 $\pm$ 1.17                | 9.56 $\pm$ 0.79                    | 17.49 $\pm$ 1.16                | 45.46 $\pm$ 3.66                    |
| 19 wk                   | 6  | 8.12 $\pm$ 1.98                | 9.58 $\pm$ 0.55 <sup>C2*</sup>     | 16.88 $\pm$ 0.38                | 45.67 $\pm$ 2.97 <sup>C2*</sup>     |
| 30 wk                   | 3  | 9.77 $\pm$ 2.82                | 9.58 $\pm$ 0.27                    | 16.93 $\pm$ 0.32                | 45.97 $\pm$ 2.38                    |
| 43 wk                   | 3  | 7.53 $\pm$ 0.83                | 8.90 $\pm$ 1.54                    | 16.03 $\pm$ 2.27                | 42.70 $\pm$ 6.76                    |
| Treatment group 2: 5 wk | 10 | 6.65 $\pm$ 2.80                | 8.75 $\pm$ 0.44                    | 16.35 $\pm$ 0.65                | 42.99 $\pm$ 2.34                    |
| 11 wk                   | 7  | 9.61 $\pm$ 1.52                | 10.50 $\pm$ 1.43                   | 18.46 $\pm$ 2.23                | 49.27 $\pm$ 7.70                    |
| 19 wk                   | 7  | 8.68 $\pm$ 0.34 <sup>^</sup>   | 9.69 $\pm$ 0.91 <sup>C2*</sup>     | 17.44 $\pm$ 1.54 <sup>C2*</sup> | 46.13 $\pm$ 4.88 <sup>C2*</sup>     |
| 30 wk                   | 4  | 11.13 $\pm$ 3.50               | 9.14 $\pm$ 0.52                    | 16.60 $\pm$ 0.10 <sup>^</sup>   | 42.07 $\pm$ 0.45 <sup>^</sup>       |
| 43 wk                   | 4  | 7.30 $\pm$ 2.24                | 8.77 $\pm$ 0.41                    | 15.63 $\pm$ 0.74                | 41.48 $\pm$ 2.44                    |
| Treatment group 3: 5 wk | 10 | 5.48 $\pm$ 1.82 <sup>C1*</sup> | 8.70 $\pm$ 0.35                    | 16.02 $\pm$ 0.63                | 42.81 $\pm$ 2.14                    |
| 11 wk                   | 7  | 7.29 $\pm$ 1.54                | 9.26 $\pm$ 0.28                    | 16.81 $\pm$ 0.43                | 43.09 $\pm$ 1.65                    |
| 19 wk                   | 7  | 8.40 $\pm$ 1.33                | 9.24 $\pm$ 0.34                    | 16.63 $\pm$ 0.78                | 43.34 $\pm$ 2.21                    |
| 30 wk                   | 4  | 12.63 $\pm$ 3.38               | 9.31 $\pm$ 0.70                    | 17.08 $\pm$ 0.94                | 44.23 $\pm$ 3.32                    |
| 43 wk                   | 4  | 7.68 $\pm$ 3.01                | 9.03 $\pm$ 0.35                    | 16.10 $\pm$ 0.00 <sup>^</sup>   | 42.80 $\pm$ 1.56                    |

HCT: hematocrit; HGB: hemoglobin;; RBC: red blood cell count; WBC: white blood cell count.

**Table S14.** Hematologic parameters in male mice. Values represent the mean  $\pm$  SD. The reference values are based on the baseline (-1 wk) measurements. Asterisks show the significance level with \*:  $p \leq 0.05$ .

<sup>C1/C2/T1/T2/T3</sup> Significant difference as compared with e.g. control group 1 (C1) at the same time point.

^ Outlier excluded from dataset (N = N-1)

| Males                   | N  | MCV ( $\mu\text{m}^3$ )             | MCH (pg)                              | MCHC (g/dl)                   | PLT ( $10^3/\text{mm}^3$ )      |
|-------------------------|----|-------------------------------------|---------------------------------------|-------------------------------|---------------------------------|
| Reference value         | 50 | 48.31 $\pm$ 0.68 <sup>^</sup>       | 17.85 $\pm$ 0.55                      | 36.93 $\pm$ 1.12              | 718.02 $\pm$ 175.49             |
| Control group 1: 5 wk   | 10 | 47.70 $\pm$ 0.67 <sup>T2*</sup>     | 18.27 $\pm$ 0.47                      | 38.29 $\pm$ 1.36              | 825.60 $\pm$ 121.58             |
| 11 wk                   | 7  | 47.14 $\pm$ 0.69                    | 18.33 $\pm$ 0.39                      | 39.04 $\pm$ 0.82              | 744.71 $\pm$ 130.80             |
| 19 wk                   | 7  | 47.43 $\pm$ 0.53                    | 18.17 $\pm$ 0.35 <sup>^</sup>         | 38.22 $\pm$ 0.81 <sup>^</sup> | 935.14 $\pm$ 164.96             |
| 30 wk                   | 4  | 48.25 $\pm$ 0.50                    | 18.58 $\pm$ 0.68                      | 38.60 $\pm$ 1.29              | 1163.75 $\pm$ 168.54            |
| 43 wk                   | 4  | 47.50 $\pm$ 0.58                    | 18.17 $\pm$ 0.06 <sup>^/C2*/T3*</sup> | 38.00 $\pm$ 0.85              | 1183.75 $\pm$ 141.96            |
| Control group 2: 5 wk   | 10 | 47.50 $\pm$ 0.71 <sup>T2*/T3*</sup> | 18.29 $\pm$ 1.12                      | 38.44 $\pm$ 2.56              | 863.90 $\pm$ 120.87             |
| 11 wk                   | 7  | 46.86 $\pm$ 0.90                    | 18.20 $\pm$ 0.26 <sup>^</sup>         | 38.60 $\pm$ 0.35 <sup>^</sup> | 738.14 $\pm$ 174.38             |
| 19 wk                   | 7  | 47.43 $\pm$ 0.98                    | 18.09 $\pm$ 0.79                      | 38.11 $\pm$ 1.44              | 947.29 $\pm$ 198.53             |
| 30 wk                   | 4  | 48.00 $\pm$ 0.82                    | 18.43 $\pm$ 0.43                      | 38.33 $\pm$ 1.04              | 1157.25 $\pm$ 52.10             |
| 43 wk                   | 4  | 47.50 $\pm$ 0.58                    | 17.48 $\pm$ 0.38 <sup>C1*/T1*</sup>   | 36.70 $\pm$ 0.89              | 1005.25 $\pm$ 118.46            |
| Treatment group 1: 5 wk | 10 | 48.10 $\pm$ 0.74                    | 18.50 $\pm$ 0.58                      | 38.54 $\pm$ 1.27              | 839.00 $\pm$ 102.63             |
| 11 wk                   | 7  | 47.57 $\pm$ 0.98                    | 18.31 $\pm$ 0.74                      | 38.51 $\pm$ 1.74              | 719.00 $\pm$ 153.62             |
| 19 wk                   | 6  | 47.20 $\pm$ 0.45 <sup>^</sup>       | 17.67 $\pm$ 0.90                      | 37.08 $\pm$ 2.28              | 929.50 $\pm$ 162.70             |
| 30 wk                   | 3  | 47.67 $\pm$ 1.15                    | 17.70 $\pm$ 0.70                      | 37.00 $\pm$ 2.23              | 1110.33 $\pm$ 130.11            |
| 43 wk                   | 3  | 48.00 $\pm$ 1.00                    | 18.50 $\pm$ 0.00 <sup>^/C2*</sup>     | 37.70 $\pm$ 1.15              | 1133.67 $\pm$ 46.61             |
| Treatment group 2: 5 wk | 10 | 49.20 $\pm$ 1.23 <sup>C1*/C2*</sup> | 18.68 $\pm$ 0.52                      | 38.03 $\pm$ 1.64              | 870.44 $\pm$ 38.83 <sup>^</sup> |
| 11 wk                   | 7  | 47.00 $\pm$ 1.00                    | 17.63 $\pm$ 0.60                      | 37.69 $\pm$ 1.71              | 693.57 $\pm$ 226.99             |
| 19 wk                   | 7  | 47.57 $\pm$ 1.40                    | 18.01 $\pm$ 0.46                      | 38.47 $\pm$ 1.34 <sup>^</sup> | 873.17 $\pm$ 90.74 <sup>^</sup> |
| 30 wk                   | 4  | 47.00 $\pm$ 0.00 <sup>^</sup>       | 18.50 $\pm$ 0.57                      | 39.13 $\pm$ 0.83              | 1086.25 $\pm$ 76.59             |
| 43 wk                   | 4  | 47.50 $\pm$ 1.29                    | 17.90 $\pm$ 0.00 <sup>^</sup>         | 37.75 $\pm$ 1.19              | 1278.50 $\pm$ 89.12             |
| Treatment group 3: 5 wk | 10 | 48.67 $\pm$ 0.87 <sup>^/C2*</sup>   | 18.42 $\pm$ 0.83                      | 37.48 $\pm$ 2.49              | 798.40 $\pm$ 121.37             |
| 11 wk                   | 7  | 46.43 $\pm$ 0.79                    | 18.14 $\pm$ 0.29                      | 39.03 $\pm$ 0.67              | 830.00 $\pm$ 73.06 <sup>^</sup> |
| 19 wk                   | 7  | 46.86 $\pm$ 1.21                    | 17.99 $\pm$ 0.58                      | 38.41 $\pm$ 1.24              | 917.86 $\pm$ 118.00             |
| 30 wk                   | 4  | 48.00 $\pm$ 0.00 <sup>^</sup>       | 18.38 $\pm$ 0.40                      | 38.65 $\pm$ 0.85              | 955.50 $\pm$ 188.55             |
| 43 wk                   | 4  | 48.00 $\pm$ 0.00 <sup>^</sup>       | 17.60 $\pm$ 0.22 <sup>C1*/T1*</sup>   | 37.08 $\pm$ 0.53              | 1062.75 $\pm$ 90.16             |

MCH: mean cell hemoglobin; MCHC: mean cell hemoglobin concentration; MCV: mean cell volume; PLT: platelet count.



**Table S15.** Hematologic parameters in female mice. Values represent the mean  $\pm$  SD. The reference values are based on the baseline (-1 wk) measurements. Asterisks show the significance level with \*:  $p \leq 0.05$ .

<sup>C1/C2/T1/T2/T3</sup> Significant difference as compared with e.g. control group 1 (C1) at the same time point.

^ Outlier excluded from dataset (N = N-1)

| Females                 | N  | WBC ( $10^3/\text{mm}^3$ )         | RBC ( $10^6/\text{mm}^3$ )   | HGB (g/dl)                       | HCT (%)                       |
|-------------------------|----|------------------------------------|------------------------------|----------------------------------|-------------------------------|
| Reference value         | 50 | 7.63 $\pm$ 2.25                    | 8.53 $\pm$ 0.57 <sup>^</sup> | 15.75 $\pm$ 0.75                 | 41.69 $\pm$ 2.64              |
| Control group 1: 5 wk   | 10 | 7.15 $\pm$ 0.94 <sup>T3*</sup>     | 8.36 $\pm$ 0.57 <sup>^</sup> | 15.76 $\pm$ 0.96                 | 40.88 $\pm$ 2.65 <sup>^</sup> |
| 11 wk                   | 7  | 7.71 $\pm$ 2.53                    | 9.19 $\pm$ 0.38              | 17.00 $\pm$ 0.19 <sup>^</sup>    | 43.61 $\pm$ 1.51              |
| 19 wk                   | 7  | 7.63 $\pm$ 0.51 <sup>^</sup>       | 9.07 $\pm$ 0.50              | 17.00 $\pm$ 0.81                 | 42.86 $\pm$ 2.27              |
| 30 wk                   | 4  | 9.03 $\pm$ 1.48                    | 9.34 $\pm$ 0.19              | 17.00 $\pm$ 0.00 <sup>^T3</sup>  | 44.90 $\pm$ 1.64              |
| 43 wk                   | 4  | 8.30 $\pm$ 3.68                    | 8.94 $\pm$ 0.47              | 16.00 $\pm$ 0.50                 | 42.65 $\pm$ 1.82              |
| Control group 2: 5 wk   | 10 | 7.27 $\pm$ 1.51 <sup>T3*</sup>     | 8.42 $\pm$ 0.39              | 15.61 $\pm$ 0.74 <sup>^</sup>    | 40.85 $\pm$ 3.14              |
| 11 wk                   | 7  | 8.51 $\pm$ 2.34                    | 9.01 $\pm$ 0.34              | 16.27 $\pm$ 0.49                 | 42.01 $\pm$ 1.60              |
| 19 wk                   | 7  | 6.74 $\pm$ 3.19                    | 8.57 $\pm$ 0.55              | 15.97 $\pm$ 1.00                 | 40.57 $\pm$ 2.81              |
| 30 wk                   | 4  | 10.38 $\pm$ 2.86                   | 9.30 $\pm$ 0.44              | 16.53 $\pm$ 0.51                 | 44.18 $\pm$ 2.83              |
| 43 wk                   | 4  | 7.40 $\pm$ 0.72 <sup>^</sup>       | 8.92 $\pm$ 0.63              | 16.38 $\pm$ 1.01                 | 42.08 $\pm$ 3.01              |
| Treatment group 1: 5 wk | 10 | 6.20 $\pm$ 2.24                    | 8.51 $\pm$ 0.45              | 16.19 $\pm$ 0.58                 | 41.51 $\pm$ 2.18              |
| 11 wk                   | 7  | 7.60 $\pm$ 3.77                    | 8.59 $\pm$ 0.31 <sup>^</sup> | 15.88 $\pm$ 0.43 <sup>^</sup>    | 40.26 $\pm$ 1.41              |
| 19 wk                   | 7  | 6.80 $\pm$ 1.64                    | 9.37 $\pm$ 1.10              | 16.90 $\pm$ 1.83                 | 43.89 $\pm$ 5.14              |
| 30 wk                   | 4  | 9.70 $\pm$ 2.96                    | 8.71 $\pm$ 0.27              | 16.30 $\pm$ 0.52                 | 41.33 $\pm$ 0.79              |
| 43 wk                   | 3  | 7.20 $\pm$ 3.97                    | 8.91 $\pm$ 0.89              | 16.50 $\pm$ 0.66                 | 43.27 $\pm$ 3.17              |
| Treatment group 2: 5 wk | 10 | 5.89 $\pm$ 2.56                    | 8.70 $\pm$ 0.63              | 16.27 $\pm$ 0.78                 | 41.91 $\pm$ 3.22              |
| 11 wk                   | 7  | 7.97 $\pm$ 2.09                    | 9.05 $\pm$ 0.72              | 16.59 $\pm$ 0.85                 | 41.64 $\pm$ 3.22              |
| 19 wk                   | 7  | 6.74 $\pm$ 1.77                    | 8.61 $\pm$ 0.98              | 15.59 $\pm$ 1.56                 | 39.66 $\pm$ 4.17              |
| 30 wk                   | 4  | 8.98 $\pm$ 1.67                    | 9.07 $\pm$ 0.27              | 16.65 $\pm$ 0.31                 | 43.50 $\pm$ 1.68              |
| 43 wk                   | 4  | 9.10 $\pm$ 3.17                    | 8.96 $\pm$ 0.18              | 15.53 $\pm$ 0.85                 | 41.90 $\pm$ 1.79              |
| Treatment group 3: 5 wk | 10 | 4.36 $\pm$ 1.67 <sup>C1*/C2*</sup> | 8.75 $\pm$ 0.47              | 16.04 $\pm$ 0.44                 | 42.16 $\pm$ 2.40              |
| 11 wk                   | 7  | 7.57 $\pm$ 1.58                    | 9.04 $\pm$ 0.32 <sup>^</sup> | 16.56 $\pm$ 0.81                 | 43.04 $\pm$ 2.97              |
| 19 wk                   | 7  | 7.69 $\pm$ 2.31                    | 9.62 $\pm$ 1.71              | 16.44 $\pm$ 1.77                 | 44.93 $\pm$ 7.28              |
| 30 wk                   | 4  | 7.93 $\pm$ 2.49                    | 9.22 $\pm$ 0.66              | 15.83 $\pm$ 0.06 <sup>^C1*</sup> | 41.13 $\pm$ 0.23 <sup>^</sup> |
| 43 wk                   | 4  | 8.90 $\pm$ 3.34                    | 9.72 $\pm$ 0.26              | 15.30 $\pm$ 0.29                 | 44.95 $\pm$ 1.05              |

HCT: hematocrit; HGB: hemoglobin;; RBC: red blood cell count; WBC: white blood cell count.

**Table S16.** Hematologic parameters in female mice. Values represent the mean  $\pm$  SD. The reference values are based on the baseline (-1 wk) measurements. Asterisks show the significance level with \*:  $p \leq 0.05$ .

C1/C2/T1/T2/T3 Significant difference as compared with e.g. control group 1 (C1) at the same time point.

^ Outlier excluded from dataset (N = N-1)

| Females                 | N  | MCV ( $\mu\text{m}^3$ )             | MCH (pg)                             | MCHC (g/dl)                                 | PLT ( $10^3/\text{mm}^3$ )         |
|-------------------------|----|-------------------------------------|--------------------------------------|---------------------------------------------|------------------------------------|
| Reference value         | 50 | 48.78 $\pm$ 0.65                    | 18.46 $\pm$ 0.63                     | 37.77 $\pm$ 1.09                            | 665.68 $\pm$ 177.78                |
| Control group 1: 5 wk   | 10 | 49.10 $\pm$ 0.99 <sup>C2*/T3*</sup> | 18.80 $\pm$ 0.44                     | 38.80 $\pm$ 0.77 <sup>^</sup>               | 828.80 $\pm$ 209.20                |
| 11 wk                   | 7  | 47.43 $\pm$ 0.79 <sup>T2*</sup>     | 18.34 $\pm$ 0.36                     | 38.60 $\pm$ 0.55                            | 872.71 $\pm$ 104.41                |
| 19 wk                   | 7  | 47.29 $\pm$ 0.76                    | 18.76 $\pm$ 0.41 <sup>T3*</sup>      | 39.71 $\pm$ 0.84 <sup>T3*</sup>             | 910.14 $\pm$ 153.55                |
| 30 wk                   | 4  | 48.00 $\pm$ 0.82                    | 17.98 $\pm$ 0.68                     | 37.50 $\pm$ 2.07                            | 966.25 $\pm$ 201.80                |
| 43 wk                   | 4  | 48.00 $\pm$ 0.82                    | 17.95 $\pm$ 1.12                     | 37.55 $\pm$ 1.74 <sup>T3*</sup>             | 1041.25 $\pm$ 87.21                |
| Control group 2: 5 wk   | 10 | 47.50 $\pm$ 0.71 <sup>C1*</sup>     | 18.55 $\pm$ 0.34                     | 39.02 $\pm$ 0.47                            | 949.60 $\pm$ 59.20 <sup>T2*</sup>  |
| 11 wk                   | 7  | 46.57 $\pm$ 0.53                    | 18.07 $\pm$ 0.29                     | 38.77 $\pm$ 0.49                            | 839.00 $\pm$ 244.75                |
| 19 wk                   | 7  | 47.14 $\pm$ 0.69                    | 18.67 $\pm$ 0.50 <sup>T3*</sup>      | 39.43 $\pm$ 1.37                            | 910.29 $\pm$ 143.31                |
| 30 wk                   | 4  | 47.75 $\pm$ 0.96                    | 17.80 $\pm$ 0.91                     | 37.55 $\pm$ 2.64                            | 982.75 $\pm$ 135.76                |
| 43 wk                   | 4  | 47.00 $\pm$ 0.00 <sup>^</sup>       | 18.35 $\pm$ 0.19 <sup>T3*</sup>      | 38.88 $\pm$ 0.59 <sup>T3*</sup>             | 854.75 $\pm$ 343.71                |
| Treatment group 1: 5 wk | 10 | 48.33 $\pm$ 0.71 <sup>^</sup>       | 19.04 $\pm$ 0.44 <sup>T3*</sup>      | 39.05 $\pm$ 1.35                            | 774.80 $\pm$ 109.24                |
| 11 wk                   | 7  | 46.71 $\pm$ 0.95                    | 18.50 $\pm$ 0.71                     | 39.76 $\pm$ 1.01                            | 722.14 $\pm$ 162.36                |
| 19 wk                   | 7  | 46.86 $\pm$ 0.69                    | 18.37 $\pm$ 0.28 <sup>^</sup>        | 38.43 $\pm$ 1.45                            | 792.14 $\pm$ 187.73                |
| 30 wk                   | 4  | 47.00 $\pm$ 0.00 <sup>^</sup>       | 18.75 $\pm$ 0.99                     | 39.45 $\pm$ 1.74                            | 1011.67 $\pm$ 28.22 <sup>^</sup>   |
| 43 wk                   | 3  | 49.00 $\pm$ 0.00 <sup>^</sup>       | 18.60 $\pm$ 1.08 <sup>T3*</sup>      | 38.30 $\pm$ 1.30 <sup>T3*</sup>             | 675.33 $\pm$ 129.51                |
| Treatment group 2: 5 wk | 10 | 48.10 $\pm$ 0.74                    | 18.74 $\pm$ 0.80                     | 38.91 $\pm$ 1.70                            | 698.60 $\pm$ 200.39 <sup>C2*</sup> |
| 11 wk                   | 7  | 45.86 $\pm$ 0.69 <sup>C1*</sup>     | 18.37 $\pm$ 0.74                     | 39.93 $\pm$ 1.51                            | 798.71 $\pm$ 116.74                |
| 19 wk                   | 7  | 46.00 $\pm$ 1.15                    | 18.16 $\pm$ 0.81                     | 39.31 $\pm$ 1.26                            | 806.14 $\pm$ 175.91                |
| 30 wk                   | 4  | 48.00 $\pm$ 0.00 <sup>^</sup>       | 17.93 $\pm$ 0.06 <sup>^</sup>        | 37.27 $\pm$ 0.23 <sup>^</sup>               | 1028.00 $\pm$ 41.41                |
| 43 wk                   | 4  | 46.75 $\pm$ 2.06                    | 17.33 $\pm$ 1.17                     | 37.05 $\pm$ 1.17 <sup>T3*</sup>             | 952.00 $\pm$ 199.80                |
| Treatment group 3: 5 wk | 10 | 48.00 $\pm$ 0.82 <sup>C1*</sup>     | 18.25 $\pm$ 0.66 <sup>T1*</sup>      | 38.14 $\pm$ 1.64                            | 764.67 $\pm$ 72.21 <sup>^</sup>    |
| 11 wk                   | 7  | 46.43 $\pm$ 0.98                    | 17.90 $\pm$ 0.63                     | 38.56 $\pm$ 1.23                            | 731.29 $\pm$ 144.20                |
| 19 wk                   | 7  | 46.86 $\pm$ 1.77                    | 17.29 $\pm$ 1.56 <sup>C1*/C2*</sup>  | 36.94 $\pm$ 2.97 <sup>C1*</sup>             | 742.14 $\pm$ 181.84                |
| 30 wk                   | 4  | 46.50 $\pm$ 1.29                    | 17.75 $\pm$ 0.42                     | 38.50 $\pm$ 0.10 <sup>^</sup>               | 996.50 $\pm$ 96.63                 |
| 43 wk                   | 4  | 46.25 $\pm$ 0.96                    | 15.90 $\pm$ 0.00 <sup>^C2*/T1*</sup> | 34.08 $\pm$ 0.28 <sup>C1*/C2*/T1*/T2*</sup> | 763.00 $\pm$ 260.79                |

MCH: mean cell hemoglobin; MCHC: mean cell hemoglobin concentration; MCV: mean cell volume; PLT: platelet count.

**Table S17.** Clinical chemistry parameters in male mice. Values represent the mean  $\pm$  SD. The reference values are based on the baseline (-1 wk) measurements. Asterisks show the significance level with \*:  $p \leq 0.05$ .

C1/C2/T1/T2/T3 Significant difference as compared with e.g. control group 1 (C1) at the same time point.

^ Outlier excluded from dataset (N = N-1)

| Males                   | N  | Electrolytes                     |                              |                                | Ions                         | Small molecules (nutrition)  | Small molecules (waste products) |                                |
|-------------------------|----|----------------------------------|------------------------------|--------------------------------|------------------------------|------------------------------|----------------------------------|--------------------------------|
|                         |    | Sodium (mmol/L)                  | Potassium (mmol/L)           | Chloride (mmol/L)              | Calcium (mmol/L)             | Glucose (mmol/L)             | Creatinine ( $\mu$ mol/L)        | Urea (mmol/L)                  |
| Reference value         | 50 | 166.92 $\pm$ 3.52                | 8.59 $\pm$ 0.89              | 111.34 $\pm$ 4.66              | 2.75 $\pm$ 0.10              | 8.27 $\pm$ 1.33              | 45.30 $\pm$ 11.08                | 6.95 $\pm$ 0.85                |
| Control group 1: 5 wk   | 10 | 149.30 $\pm$ 4.22                | 6.38 $\pm$ 0.84              | 98.90 $\pm$ 6.17               | 2.36 $\pm$ 0.06              | 5.74 $\pm$ 1.24              | 32.00 $\pm$ 12.90                | 7.05 $\pm$ 1.00                |
| 11 wk                   | 7  | 158.57 $\pm$ 2.07                | 7.24 $\pm$ 0.32              | 100.29 $\pm$ 1.60              | 2.37 $\pm$ 0.04              | 5.91 $\pm$ 0.64              | 51.00 $\pm$ 19.67                | 6.39 $\pm$ 0.73                |
| 19 wk                   | 4  | 142.50 $\pm$ 2.89                | 6.63 $\pm$ 0.48              | 100.00 $\pm$ 4.08              | 1.99 $\pm$ 0.09              | 5.50 $\pm$ 0.58              | ND                               | 5.75 $\pm$ 0.65                |
| 30 wk                   | 4  | 168.75 $\pm$ 4.79                | 7.00 $\pm$ 0.41              | 111.25 $\pm$ 4.79              | 2.31 $\pm$ 0.07              | 6.50 $\pm$ 0.41              | 21.25 $\pm$ 11.81                | 6.38 $\pm$ 0.85                |
| 43 wk                   | 4  | 150.00 $\pm$ 0.00                | 5.50 $\pm$ 0.41              | 100.00 $\pm$ 0.00              | 1.98 $\pm$ 0.14              | 6.38 $\pm$ 0.85              | ND                               | 8.50 $\pm$ 2.12                |
| Control group 2: 5 wk   | 10 | 149.10 $\pm$ 3.70                | 6.71 $\pm$ 1.10              | 99.90 $\pm$ 7.28               | 2.38 $\pm$ 0.10              | 6.69 $\pm$ 1.54              | 32.90 $\pm$ 16.20                | 7.17 $\pm$ 0.64 <sup>^</sup>   |
| 11 wk                   | 7  | 158.14 $\pm$ 1.46                | 7.33 $\pm$ 0.29              | 100.71 $\pm$ 2.93              | 2.36 $\pm$ 0.02 <sup>^</sup> | 7.41 $\pm$ 2.00              | 50.14 $\pm$ 21.47                | 5.61 $\pm$ 0.86 <sup>T2*</sup> |
| 19 wk                   | 4  | 140.00 $\pm$ 0.00 <sup>T2*</sup> | 6.63 $\pm$ 0.48              | 100.00 $\pm$ 0.00 <sup>^</sup> | 1.96 $\pm$ 0.09              | 5.50 $\pm$ 0.00 <sup>^</sup> | ND                               | 5.75 $\pm$ 0.65                |
| 30 wk                   | 4  | 165.00 $\pm$ 0.00                | 7.00 $\pm$ 0.41              | 110.00 $\pm$ 0.00              | 2.38 $\pm$ 0.12              | 7.63 $\pm$ 0.48              | 36.25 $\pm$ 16.52                | 6.75 $\pm$ 1.55                |
| 43 wk                   | 4  | 151.25 $\pm$ 6.29                | 5.38 $\pm$ 0.63              | 100.00 $\pm$ 0.00 <sup>^</sup> | 1.98 $\pm$ 0.03              | 6.50 $\pm$ 1.47              | ND                               | 8.00 $\pm$ 2.12                |
| Treatment group 1: 5 wk | 10 | 148.22 $\pm$ 3.56 <sup>^</sup>   | 6.70 $\pm$ 1.10              | 100.00 $\pm$ 6.83              | 2.33 $\pm$ 0.05              | 5.77 $\pm$ 1.70              | 32.80 $\pm$ 14.64                | 7.44 $\pm$ 0.85                |
| 11 wk                   | 7  | 158.50 $\pm$ 2.95 <sup>^</sup>   | 7.50 $\pm$ 0.55              | 101.00 $\pm$ 1.55 <sup>^</sup> | 2.35 $\pm$ 0.11              | 6.56 $\pm$ 0.84              | 70.00 $\pm$ 5.25 <sup>^</sup>    | 6.60 $\pm$ 0.60                |
| 19 wk                   | 3  | 145.00 $\pm$ 0.00 <sup>^</sup>   | 6.50 $\pm$ 0.00 <sup>^</sup> | 100.00 $\pm$ 0.00              | 2.05 $\pm$ 0.00 <sup>^</sup> | 5.17 $\pm$ 0.76              | ND                               | 7.00 $\pm$ 0.00 <sup>^</sup>   |
| 30 wk                   | 3  | 170.00 $\pm$ 0.00                | 7.00 $\pm$ 0.00 <sup>^</sup> | 110.00 $\pm$ 0.00 <sup>^</sup> | 2.37 $\pm$ 0.08              | 6.83 $\pm$ 1.04              | 35.00 $\pm$ 13.23                | 7.50 $\pm$ 0.00                |
| 43 wk                   | 3  | 150.00 $\pm$ 0.00 <sup>^</sup>   | 6.00 $\pm$ 0.00 <sup>^</sup> | 100.00 $\pm$ 0.00 <sup>^</sup> | 2.02 $\pm$ 0.10              | 6.17 $\pm$ 1.89              | ND                               | 7.50 $\pm$ 0.00 <sup>^</sup>   |
| Treatment group 2: 5 wk | 10 | 150.11 $\pm$ 2.32 <sup>^</sup>   | 6.26 $\pm$ 0.79              | 100.30 $\pm$ 5.87              | 2.38 $\pm$ 0.10              | 5.13 $\pm$ 1.11              | 35.70 $\pm$ 11.01                | 7.46 $\pm$ 1.14                |
| 11 wk                   | 7  | 160.71 $\pm$ 2.36                | 7.25 $\pm$ 0.23 <sup>^</sup> | 103.71 $\pm$ 2.36              | 2.37 $\pm$ 0.03 <sup>^</sup> | 5.31 $\pm$ 1.34              | ND                               | 7.24 $\pm$ 1.41 <sup>C2*</sup> |
| 19 wk                   | 4  | 147.50 $\pm$ 2.89 <sup>C2*</sup> | 6.50 $\pm$ 0.00 <sup>^</sup> | 105.00 $\pm$ 0.00 <sup>^</sup> | 2.06 $\pm$ 0.09              | 5.75 $\pm$ 0.65              | ND                               | 7.13 $\pm$ 0.85                |
| 30 wk                   | 4  | 165.00 $\pm$ 0.00 <sup>^</sup>   | 7.25 $\pm$ 0.29              | 110.00 $\pm$ 0.00 <sup>^</sup> | 2.25 $\pm$ 0.00 <sup>^</sup> | 6.63 $\pm$ 2.10              | 42.50 $\pm$ 25.98                | 8.00 $\pm$ 1.35                |
| 43 wk                   | 4  | 150.00 $\pm$ 4.08                | 6.75 $\pm$ 2.06              | 100.00 $\pm$ 0.00 <sup>^</sup> | 1.98 $\pm$ 0.13              | 5.25 $\pm$ 0.87              | ND                               | 7.33 $\pm$ 1.26 <sup>^</sup>   |
| Treatment group 3: 5 wk | 10 | 150.20 $\pm$ 4.44                | 6.27 $\pm$ 0.75              | 99.80 $\pm$ 8.98               | 2.36 $\pm$ 0.07              | 5.60 $\pm$ 2.45              | 31.50 $\pm$ 16.08                | 7.59 $\pm$ 1.51                |
| 11 wk                   | 7  | 159.00 $\pm$ 2.45                | 7.24 $\pm$ 0.50              | 102.00 $\pm$ 2.45              | 2.42 $\pm$ 0.08              | 6.09 $\pm$ 1.80              | ND                               | 6.77 $\pm$ 0.71                |
| 19 wk                   | 4  | 143.75 $\pm$ 4.79                | 6.25 $\pm$ 0.29              | 100.00 $\pm$ 0.00 <sup>^</sup> | 2.05 $\pm$ 0.14              | 4.75 $\pm$ 0.87              | ND                               | 7.25 $\pm$ 0.87                |
| 30 wk                   | 4  | 166.25 $\pm$ 6.29                | 7.00 $\pm$ 0.00 <sup>^</sup> | 110.00 $\pm$ 4.08              | 2.30 $\pm$ 0.11              | 6.88 $\pm$ 1.89              | 30.00 $\pm$ 15.81                | 6.50 $\pm$ 0.00 <sup>^</sup>   |
| 43 wk                   | 4  | 150.00 $\pm$ 4.08                | 5.13 $\pm$ 0.63              | 100.00 $\pm$ 0.00 <sup>^</sup> | 2.00 $\pm$ 0.00              | 6.13 $\pm$ 1.65              | ND                               | 6.75 $\pm$ 1.04                |

ND: Not determined. (Value was below detection limit.)

**Table S18.** Clinical chemistry parameters in male mice. Values represent the mean  $\pm$  SD. The reference values are based on the baseline (-1 wk) measurements. Asterisks show the significance level with \*:  $p \leq 0.05$ .

<sup>C1/C2/T1/T2/T3</sup> Significant difference as compared with e.g. control group 1 (C1) at the same time point.

^ Outlier excluded from dataset (N = N-1)

| Males                   | N  | Proteins (general)              | Proteins (enzymes)             |                                   |                                      |                                            | Lipids                          |                              |
|-------------------------|----|---------------------------------|--------------------------------|-----------------------------------|--------------------------------------|--------------------------------------------|---------------------------------|------------------------------|
|                         |    | Total Protein (g/L)             | ALT (U/L)                      | AST (U/L)                         | Alk. Phosphatase (U/L)               | Amylase (U/L)                              | Lipase (U/L)                    | Cholesterol (mmol/L)         |
| Reference value         | 50 | 62.70 $\pm$ 3.11                | 37.84 $\pm$ 10.74 <sup>^</sup> | 221.33 $\pm$ 152.18 <sup>^</sup>  | 202.78 $\pm$ 21.39 <sup>^</sup>      | 3821.14 $\pm$ 922.61 <sup>^</sup>          | 34.80 $\pm$ 4.16                | 3.60 $\pm$ 0.32              |
| Control group 1: 5 wk   | 10 | 48.50 $\pm$ 3.21                | 38.22 $\pm$ 6.14 <sup>^</sup>  | 86.90 $\pm$ 21.42 <sup>T1*</sup>  | 120.44 $\pm$ 8.59 <sup>^T3*</sup>    | 2537.80 $\pm$ 263.31                       | 27.20 $\pm$ 2.82                | 3.00 $\pm$ 0.22              |
| 11 wk                   | 7  | 54.00 $\pm$ 0.00 <sup>^</sup>   | 42.00 $\pm$ 6.00               | 136.29 $\pm$ 55.96                | 98.14 $\pm$ 8.25                     | 2586.00 $\pm$ 69.30 <sup>^</sup>           | 29.57 $\pm$ 2.70                | 3.00 $\pm$ 0.00 <sup>^</sup> |
| 19 wk                   | 4  | 42.50 $\pm$ 6.45                | ND                             | 88.75 $\pm$ 11.09                 | 70.00 $\pm$ 0.00 <sup>^T2*/T3*</sup> | 2075.00 $\pm$ 37.75 <sup>^</sup>           | 12.50 $\pm$ 6.45                | 2.50 $\pm$ 0.00 <sup>^</sup> |
| 30 wk                   | 4  | 50.00 $\pm$ 4.08 <sup>C2*</sup> | 23.83 $\pm$ 0.29 <sup>^</sup>  | 110.00 $\pm$ 25.50                | 72.50 $\pm$ 6.45                     | 2667.50 $\pm$ 251.35                       | 33.75 $\pm$ 6.29                | 2.50 $\pm$ 0.00 <sup>^</sup> |
| 43 wk                   | 4  | 45.00 $\pm$ 4.08                | 58.75 $\pm$ 17.97              | 81.25 $\pm$ 30.92                 | 72.50 $\pm$ 6.45                     | 2458.75 $\pm$ 46.08 <sup>T1*</sup>         | 25.00 $\pm$ 0.00 <sup>^</sup>   | 2.50 $\pm$ 0.41              |
| Control group 2: 5 wk   | 10 | 48.60 $\pm$ 1.78                | 50.20 $\pm$ 16.17              | 119.56 $\pm$ 53.82 <sup>^</sup>   | 117.70 $\pm$ 8.30                    | 2488.67 $\pm$ 189.94 <sup>^</sup>          | 29.20 $\pm$ 3.68 <sup>T3*</sup> | 2.84 $\pm$ 0.15 <sup>^</sup> |
| 11 wk                   | 7  | 54.86 $\pm$ 1.46                | 40.71 $\pm$ 7.32               | 111.50 $\pm$ 30.02 <sup>^</sup>   | 100.29 $\pm$ 7.72                    | 2499.00 $\pm$ 138.83 <sup>^</sup>          | 25.29 $\pm$ 2.93                | 2.87 $\pm$ 0.24              |
| 19 wk                   | 4  | 46.25 $\pm$ 4.79                | ND                             | 158.75 $\pm$ 58.65                | 62.50 $\pm$ 6.45 <sup>T2*/T3**</sup> | 2016.25 $\pm$ 219.79                       | 20.00 $\pm$ 7.07                | 2.38 $\pm$ 0.48              |
| 30 wk                   | 4  | 55.00 $\pm$ 0.00 <sup>C1*</sup> | 31.25 $\pm$ 6.29               | 136.25 $\pm$ 53.44                | 80.00 $\pm$ 7.07                     | 2700.00 $\pm$ 135.83                       | 32.50 $\pm$ 6.45                | 2.75 $\pm$ 0.29              |
| 43 wk                   | 4  | 45.00 $\pm$ 0.00 <sup>^</sup>   | 50.00 $\pm$ 16.83              | 65.00 $\pm$ 19.58                 | 67.50 $\pm$ 2.89                     | 2427.50 $\pm$ 167.21 <sup>T1*</sup>        | 25.00 $\pm$ 0.00 <sup>^</sup>   | 2.50 $\pm$ 0.00 <sup>^</sup> |
| Treatment group 1: 5 wk | 10 | 49.40 $\pm$ 2.41                | 48.44 $\pm$ 11.20 <sup>^</sup> | 158.70 $\pm$ 85.00 <sup>C1*</sup> | 114.00 $\pm$ 8.28 <sup>^</sup>       | 2539.56 $\pm$ 142.08 <sup>^</sup>          | 27.07 $\pm$ 4.24 <sup>^</sup>   | 3.02 $\pm$ 0.23              |
| 11 wk                   | 7  | 53.57 $\pm$ 3.64 <sup>T3*</sup> | 42.00 $\pm$ 4.58               | 149.57 $\pm$ 51.97                | 98.57 $\pm$ 4.04                     | 2644.00 $\pm$ 166.86 <sup>^T2*</sup>       | 30.50 $\pm$ 2.26 <sup>^</sup>   | 2.87 $\pm$ 0.24              |
| 19 wk                   | 3  | 40.00 $\pm$ 0.00 <sup>^</sup>   | ND                             | 93.33 $\pm$ 23.63                 | 70.00 $\pm$ 0.00 <sup>^</sup>        | 2098.33 $\pm$ 102.63                       | 25.00 $\pm$ 13.23               | 2.50 $\pm$ 0.00 <sup>^</sup> |
| 30 wk                   | 3  | 55.00 $\pm$ 0.00 <sup>^</sup>   | 25.00 $\pm$ 0.00 <sup>^</sup>  | 80.00 $\pm$ 22.91                 | 85.00 $\pm$ 10.00                    | 3003.33 $\pm$ 122.51                       | 35.00 $\pm$ 5.00                | 2.50 $\pm$ 0.00 <sup>^</sup> |
| 43 wk                   | 3  | 45.00 $\pm$ 0.00 <sup>^</sup>   | 40.00 $\pm$ 0.00 <sup>^</sup>  | 113.33 $\pm$ 27.57                | 68.33 $\pm$ 20.82                    | 2970.00 $\pm$ 0.00 <sup>^C1*/C2*/T3*</sup> | 36.67 $\pm$ 12.58               | 2.50 $\pm$ 0.00              |
| Treatment group 2: 5 wk | 10 | 51.20 $\pm$ 3.26                | 43.67 $\pm$ 9.67 <sup>^</sup>  | 146.40 $\pm$ 38.81                | 112.40 $\pm$ 16.22                   | 2535.80 $\pm$ 223.82                       | 24.98 $\pm$ 4.66                | 3.13 $\pm$ 0.41              |
| 11 wk                   | 7  | 56.14 $\pm$ 2.27                | 36.86 $\pm$ 2.85               | 117.00 $\pm$ 41.82                | 96.86 $\pm$ 9.44                     | 2424.43 $\pm$ 133.11 <sup>T1*</sup>        | 25.71 $\pm$ 2.93                | 3.04 $\pm$ 0.21              |
| 19 wk                   | 4  | 45.00 $\pm$ 0.00 <sup>^</sup>   | ND                             | 106.25 $\pm$ 56.77                | 85.00 $\pm$ 0.00 <sup>^C1*/C2*</sup> | 2172.50 $\pm$ 97.77                        | 18.75 $\pm$ 8.54                | 2.50 $\pm$ 0.00              |
| 30 wk                   | 4  | 50.00 $\pm$ 0.00 <sup>^</sup>   | 32.63 $\pm$ 8.42               | 152.50 $\pm$ 72.63                | 80.00 $\pm$ 0.00                     | 2852.50 $\pm$ 169.53                       | 35.00 $\pm$ 13.54               | 2.50 $\pm$ 0.00              |
| 43 wk                   | 4  | 47.50 $\pm$ 2.89                | 53.75 $\pm$ 20.56              | 93.75 $\pm$ 8.54                  | 75.00 $\pm$ 15.81                    | 2566.25 $\pm$ 206.74                       | 33.75 $\pm$ 11.81               | 2.50 $\pm$ 0.00 <sup>^</sup> |
| Treatment group 3: 5 wk | 10 | 49.50 $\pm$ 2.42                | 46.70 $\pm$ 13.01              | 116.80 $\pm$ 47.99                | 103.20 $\pm$ 13.73 <sup>C1*</sup>    | 2547.22 $\pm$ 278.84 <sup>^</sup>          | 22.50 $\pm$ 3.27 <sup>C2*</sup> | 3.15 $\pm$ 0.34              |
| 11 wk                   | 7  | 57.43 $\pm$ 2.07 <sup>T1*</sup> | 44.14 $\pm$ 4.14               | 102.86 $\pm$ 34.63                | 99.43 $\pm$ 5.59                     | 2533.50 $\pm$ 45.96 <sup>^</sup>           | 27.00 $\pm$ 4.90                | 3.04 $\pm$ 0.27              |
| 19 wk                   | 4  | 48.75 $\pm$ 6.29                | ND                             | 88.75 $\pm$ 40.29                 | 83.75 $\pm$ 7.50 <sup>C1*/C2**</sup> | 2346.67 $\pm$ 32.53 <sup>^</sup>           | 23.75 $\pm$ 7.50                | 2.50 $\pm$ 0.41              |
| 30 wk                   | 4  | 50.00 $\pm$ 0.00 <sup>^</sup>   | 30.00 $\pm$ 0.00 <sup>^</sup>  | 117.50 $\pm$ 32.02                | 87.50 $\pm$ 8.66                     | 2842.50 $\pm$ 114.20                       | 30.00 $\pm$ 7.07                | 2.75 $\pm$ 0.29              |
| 43 wk                   | 4  | 45.00 $\pm$ 0.00 <sup>^</sup>   | 63.75 $\pm$ 24.96              | 97.50 $\pm$ 49.41                 | 80.00 $\pm$ 17.80                    | 2453.75 $\pm$ 188.74 <sup>T1*</sup>        | 30.00 $\pm$ 7.07                | 2.50 $\pm$ 0.00 <sup>^</sup> |

ND: Not determined. (Value was below detection limit.)

**Table S19.** Clinical chemistry parameters in female mice. Values represent the mean  $\pm$  SD. The reference values are based on the baseline (-1 wk) measurements. Asterisks show the significance level with \*:  $p \leq 0.05$ .

<sup>C1/C2/T1/T2/T3</sup> Significant difference as compared with e.g. control group 1 (C1) at the same time point.

^ Outlier excluded from dataset (N = N-1)

| Females                 | N  | Electrolytes                           |                              |                                          | Ions                           | Small molecules (nutrition)     | Small molecules (waste products) |                                          |
|-------------------------|----|----------------------------------------|------------------------------|------------------------------------------|--------------------------------|---------------------------------|----------------------------------|------------------------------------------|
|                         |    | Sodium (mmol/L)                        | Potassium (mmol/L)           | Chloride (mmol/L)                        | Calcium (mmol/L)               | Glucose (mmol/L)                | Creatinine ( $\mu$ mol/L)        | Urea (mmol/L)                            |
| Reference value         | 25 | 172.32 $\pm$ 4.25                      | 8.18 $\pm$ 0.80              | 106.68 $\pm$ 2.75                        | 2.61 $\pm$ 0.12                | 7.24 $\pm$ 0.76                 | 51.64 $\pm$ 10.42                | 7.41 $\pm$ 1.11                          |
| Control group 1: 5 wk   | 10 | 142.20 $\pm$ 3.22 <sup>T2*/T3**</sup>  | 9.75 $\pm$ 1.76              | 102.30 $\pm$ 2.63 <sup>T2*/T3*</sup>     | 2.24 $\pm$ 0.07                | 5.10 $\pm$ 1.16                 | 39.30 $\pm$ 3.59                 | 7.71 $\pm$ 1.32 <sup>T2*</sup>           |
| 11 wk                   | 7  | 150.00 $\pm$ 0.00                      | 7.11 $\pm$ 0.79              | 99.00 $\pm$ 0.00                         | 2.29 $\pm$ 0.07                | 4.76 $\pm$ 0.59                 | 69.86 $\pm$ 13.93                | 6.20 $\pm$ 0.73 <sup>^</sup>             |
| 19 wk                   | 7  | 142.86 $\pm$ 4.88                      | 5.71 $\pm$ 0.76              | 100.71 $\pm$ 3.45                        | 2.13 $\pm$ 0.11                | 5.50 $\pm$ 1.12                 | ND                               | 6.29 $\pm$ 0.95 <sup>T3**</sup>          |
| 30 wk                   | 4  | 167.50 $\pm$ 2.89                      | 6.75 $\pm$ 0.29              | 110.00 $\pm$ 0.00                        | 2.34 $\pm$ 0.06                | 6.38 $\pm$ 0.48                 | 40.00 $\pm$ 14.72                | 6.38 $\pm$ 0.85                          |
| 43 wk                   | 4  | 150.00 $\pm$ 0.00                      | 5.00 $\pm$ 0.41              | 105.00 $\pm$ 0.00 <sup>^T1*/T2*</sup>    | 2.01 $\pm$ 0.07                | 5.88 $\pm$ 1.31                 | 37.00 $\pm$ 1.73 <sup>^</sup>    | 6.50 $\pm$ 0.00 <sup>^</sup>             |
| Control group 2: 5 wk   | 10 | 144.60 $\pm$ 3.10                      | 8.52 $\pm$ 1.83              | 104.10 $\pm$ 2.47 <sup>T2*</sup>         | 2.22 $\pm$ 0.06                | 4.95 $\pm$ 1.06                 | 38.70 $\pm$ 4.79                 | 7.83 $\pm$ 0.88 <sup>T2*</sup>           |
| 11 wk                   | 7  | 145.29 $\pm$ 7.52 <sup>T2*/T3*</sup>   | 7.07 $\pm$ 0.62              | 97.29 $\pm$ 6.21                         | 2.24 $\pm$ 0.13 <sup>T2*</sup> | 5.40 $\pm$ 1.04                 | 69.86 $\pm$ 25.96                | 7.07 $\pm$ 1.19                          |
| 19 wk                   | 7  | 147.14 $\pm$ 2.67                      | 5.71 $\pm$ 1.15              | 103.57 $\pm$ 2.44                        | 2.11 $\pm$ 0.13                | 5.79 $\pm$ 0.39                 | ND                               | 6.14 $\pm$ 0.38 <sup>T3**</sup>          |
| 30 wk                   | 4  | 165.00 $\pm$ 4.08                      | 6.75 $\pm$ 0.29              | 112.50 $\pm$ 2.89                        | 2.35 $\pm$ 0.06                | 6.50 $\pm$ 1.08                 | 23.75 $\pm$ 7.50                 | 7.00 $\pm$ 0.00 <sup>^</sup>             |
| 43 wk                   | 4  | 145.00 $\pm$ 5.00 <sup>^</sup>         | 4.38 $\pm$ 1.03              | 101.67 $\pm$ 2.89 <sup>^</sup>           | 2.02 $\pm$ 0.06 <sup>^</sup>   | 5.00 $\pm$ 2.08                 | 28.00 $\pm$ 4.24                 | 6.17 $\pm$ 0.76 <sup>^</sup>             |
| Treatment group 1: 5 wk | 10 | 142.50 $\pm$ 2.92 <sup>T2**/T3*</sup>  | 9.09 $\pm$ 1.84              | 102.60 $\pm$ 3.10 <sup>T2*/T3*</sup>     | 2.22 $\pm$ 0.07                | 4.50 $\pm$ 1.49                 | 37.20 $\pm$ 9.61                 | 6.84 $\pm$ 1.27 <sup>T2***/T3**</sup>    |
| 11 wk                   | 7  | 150.00 $\pm$ 0.00                      | 7.37 $\pm$ 0.45              | 100.71 $\pm$ 1.60                        | 2.27 $\pm$ 0.08                | 5.96 $\pm$ 0.74 <sup>T2*</sup>  | 56.14 $\pm$ 22.30                | 7.24 $\pm$ 1.10                          |
| 19 wk                   | 7  | 142.86 $\pm$ 2.67                      | 5.64 $\pm$ 0.94              | 102.86 $\pm$ 2.67                        | 2.14 $\pm$ 0.12                | 5.93 $\pm$ 1.06                 | ND                               | 7.29 $\pm$ 1.04                          |
| 30 wk                   | 4  | 165.00 $\pm$ 0.00 <sup>^</sup>         | 7.50 $\pm$ 0.00 <sup>^</sup> | 111.25 $\pm$ 4.79                        | 2.33 $\pm$ 0.03                | 6.50 $\pm$ 1.22                 | 37.50 $\pm$ 24.66                | 7.00 $\pm$ 1.78                          |
| 43 wk                   | 3  | 145.00 $\pm$ 0.00 <sup>^</sup>         | 5.00 $\pm$ 0.00 <sup>^</sup> | 100.00 $\pm$ 0.00 <sup>^C1*/T3*</sup>    | 2.05 $\pm$ 0.00 <sup>^</sup>   | 6.83 $\pm$ 1.04                 | 33.00 $\pm$ 0.00 <sup>^</sup>    | 6.00 $\pm$ 0.00 <sup>^</sup>             |
| Treatment group 2: 5 wk | 10 | 147.90 $\pm$ 2.47 <sup>C1**/T1**</sup> | 8.04 $\pm$ 1.38              | 108.30 $\pm$ 2.63 <sup>C1*/C2*/T1*</sup> | 2.28 $\pm$ 0.07                | 5.91 $\pm$ 1.17                 | 36.30 $\pm$ 3.59                 | 9.48 $\pm$ 0.83 <sup>C1*/C2*/T1***</sup> |
| 11 wk                   | 7  | 152.57 $\pm$ 4.72 <sup>C2*</sup>       | 7.33 $\pm$ 0.62              | 100.71 $\pm$ 3.82                        | 2.40 $\pm$ 0.10 <sup>C2*</sup> | 4.60 $\pm$ 0.41 <sup>^T1*</sup> | 73.29 $\pm$ 19.12                | 7.41 $\pm$ 0.62                          |
| 19 wk                   | 7  | 143.57 $\pm$ 3.78                      | 5.71 $\pm$ 1.04              | 102.14 $\pm$ 2.67                        | 2.10 $\pm$ 0.16                | 6.00 $\pm$ 0.82                 | ND                               | 6.64 $\pm$ 1.07 <sup>T3*</sup>           |
| 30 wk                   | 4  | 165.00 $\pm$ 0.00 <sup>^</sup>         | 7.38 $\pm$ 0.48              | 110.00 $\pm$ 0.00 <sup>^</sup>           | 2.41 $\pm$ 0.05                | 7.13 $\pm$ 0.48                 | 61.25 $\pm$ 18.87                | 7.50 $\pm$ 0.71                          |
| 43 wk                   | 4  | 150.00 $\pm$ 7.07                      | 5.25 $\pm$ 0.65              | 100.00 $\pm$ 0.00 <sup>^C1*/T3*</sup>    | 2.15 $\pm$ 0.20                | 5.88 $\pm$ 0.95                 | 34.00 $\pm$ 9.59                 | 8.13 $\pm$ 2.95                          |
| Treatment group 3: 5 wk | 10 | 147.30 $\pm$ 4.11 <sup>C1**/T1*</sup>  | 8.19 $\pm$ 1.94              | 107.10 $\pm$ 3.75 <sup>C1*/T1*</sup>     | 2.25 $\pm$ 0.08                | 5.28 $\pm$ 1.42                 | 35.40 $\pm$ 4.86                 | 8.94 $\pm$ 1.32 <sup>T1**</sup>          |
| 11 wk                   | 7  | 153.00 $\pm$ 3.46 <sup>C2*</sup>       | 7.67 $\pm$ 0.52              | 101.14 $\pm$ 2.27                        | 2.37 $\pm$ 0.08                | 5.57 $\pm$ 1.02                 | 72.00 $\pm$ 25.40                | 7.97 $\pm$ 1.26                          |
| 19 wk                   | 7  | 143.57 $\pm$ 2.44                      | 5.86 $\pm$ 0.90              | 102.86 $\pm$ 2.67                        | 2.08 $\pm$ 0.08                | 6.43 $\pm$ 1.17                 | ND                               | 8.50 $\pm$ 1.80 <sup>C1**/C2**/T2*</sup> |
| 30 wk                   | 4  | 167.50 $\pm$ 2.89                      | 7.13 $\pm$ 0.48              | 112.50 $\pm$ 2.89                        | 2.39 $\pm$ 0.05                | 7.00 $\pm$ 0.41                 | 37.50 $\pm$ 22.17                | 9.25 $\pm$ 2.40                          |
| 43 wk                   | 4  | 150.00 $\pm$ 0.00 <sup>^</sup>         | 5.75 $\pm$ 1.19              | 105.00 $\pm$ 0.00 <sup>^T1*/T2*</sup>    | 2.10 $\pm$ 0.05 <sup>^</sup>   | 9.50 $\pm$ 4.38                 | 36.75 $\pm$ 7.09                 | 8.63 $\pm$ 2.56                          |

ND: Not determined. (Value was below detection limit.)

**Table S20.** Clinical chemistry parameters in female mice. Values represent the mean  $\pm$  SD. The reference values are based on the baseline (-1 wk) measurements. Asterisks show the significance level with \*:  $p \leq 0.05$ .

<sup>C1/C2/T1/T2/T3</sup> Significant difference as compared with e.g. control group 1 (C1) at the same time point.

^ Outlier excluded from dataset (N = N-1)

| Females                 | N  | Proteins (general)                  | Proteins (enzymes)             |                                  |                                   |                                   | Lipids                              |                              |
|-------------------------|----|-------------------------------------|--------------------------------|----------------------------------|-----------------------------------|-----------------------------------|-------------------------------------|------------------------------|
|                         |    | Total Protein (g/L)                 | ALT (U/L)                      | AST (U/L)                        | Alk. Phosphatase (U/L)            | Amylase (U/L)                     | Lipase (U/L)                        | Cholesterol (mmol/L)         |
| Reference value         | 25 | 56.72 $\pm$ 3.12                    | 36.36 $\pm$ 10.22              | 236.08 $\pm$ 104.44 <sup>^</sup> | 187.17 $\pm$ 21.50 <sup>^</sup>   | 3043.58 $\pm$ 362.10 <sup>^</sup> | 33.32 $\pm$ 3.29                    | 2.94 $\pm$ 0.28              |
| Control group 1: 5 wk   | 10 | 48.30 $\pm$ 3.30                    | 34.00 $\pm$ 15.66 <sup>^</sup> | 137.40 $\pm$ 57.25               | 103.67 $\pm$ 4.27 <sup>^</sup>    | 2264.10 $\pm$ 320.44              | 25.50 $\pm$ 3.54 <sup>T2*/T3*</sup> | 2.43 $\pm$ 0.22              |
| 11 wk                   | 7  | 51.86 $\pm$ 1.46                    | 33.00 $\pm$ 9.64               | 142.50 $\pm$ 56.63 <sup>^</sup>  | 94.71 $\pm$ 9.93                  | 2343.50 $\pm$ 56.65 <sup>^</sup>  | 24.00 $\pm$ 2.45                    | 2.19 $\pm$ 0.23              |
| 19 wk                   | 7  | 47.14 $\pm$ 5.67                    | ND                             | 100.00 $\pm$ 39.48               | 73.57 $\pm$ 5.56                  | 2177.14 $\pm$ 88.59               | 22.86 $\pm$ 15.24                   | 1.79 $\pm$ 0.27              |
| 30 wk                   | 4  | 55.00 $\pm$ 0.00 <sup>^</sup>       | 25.38 $\pm$ 3.50               | 115.00 $\pm$ 12.91               | 80.00 $\pm$ 12.25                 | 2872.50 $\pm$ 241.95              | 35.00 $\pm$ 4.08                    | 2.00 $\pm$ 0.00 <sup>^</sup> |
| 43 wk                   | 4  | 45.00 $\pm$ 0.00 <sup>^</sup>       | 52.50 $\pm$ 16.58              | 105.00 $\pm$ 30.28               | 77.50 $\pm$ 9.57                  | 2368.75 $\pm$ 192.67              | 35.00 $\pm$ 5.77                    | 1.75 $\pm$ 0.29              |
| Control group 2: 5 wk   | 10 | 48.00 $\pm$ 2.00                    | 35.33 $\pm$ 15.06 <sup>^</sup> | 159.90 $\pm$ 75.14               | 100.20 $\pm$ 6.96                 | 2394.00 $\pm$ 456.64              | 23.70 $\pm$ 1.70                    | 2.46 $\pm$ 0.13              |
| 11 wk                   | 7  | 49.29 $\pm$ 2.93 <sup>T2*</sup>     | 33.00 $\pm$ 4.58               | 156.43 $\pm$ 55.17               | 84.43 $\pm$ 7.63                  | 2479.00 $\pm$ 508.35 <sup>^</sup> | 22.71 $\pm$ 2.36                    | 2.23 $\pm$ 0.24              |
| 19 wk                   | 7  | 45.71 $\pm$ 6.07                    | ND                             | 113.57 $\pm$ 40.28               | 73.57 $\pm$ 9.88                  | 2310.00 $\pm$ 387.62              | 17.14 $\pm$ 8.09                    | 1.86 $\pm$ 0.38              |
| 30 wk                   | 4  | 52.50 $\pm$ 2.89                    | 23.00 $\pm$ 0.87 <sup>^</sup>  | 97.50 $\pm$ 17.56                | 86.25 $\pm$ 8.54                  | 2881.25 $\pm$ 244.76              | 30.00 $\pm$ 0.00 <sup>^</sup>       | 2.00 $\pm$ 0.00              |
| 43 wk                   | 4  | 41.25 $\pm$ 11.09                   | 38.75 $\pm$ 8.54               | 87.50 $\pm$ 22.55                | 71.25 $\pm$ 14.93 <sup>T3*</sup>  | 2196.25 $\pm$ 660.32              | 32.50 $\pm$ 8.66                    | 2.00 $\pm$ 0.00 <sup>^</sup> |
| Treatment group 1: 5 wk | 10 | 47.70 $\pm$ 3.86                    | 30.67 $\pm$ 7.76 <sup>^</sup>  | 146.33 $\pm$ 50.91 <sup>^</sup>  | 104.70 $\pm$ 11.61                | 2207.00 $\pm$ 90.54 <sup>^</sup>  | 24.60 $\pm$ 2.76 <sup>T2*</sup>     | 2.52 $\pm$ 0.15              |
| 11 wk                   | 7  | 50.14 $\pm$ 1.46 <sup>T2*</sup>     | 31.71 $\pm$ 8.64               | 168.43 $\pm$ 97.85               | 85.71 $\pm$ 8.98                  | 2291.50 $\pm$ 234.84 <sup>^</sup> | 22.71 $\pm$ 5.44                    | 2.23 $\pm$ 0.24              |
| 19 wk                   | 7  | 45.00 $\pm$ 5.00                    | ND                             | 93.57 $\pm$ 26.41                | 68.75 $\pm$ 4.76                  | 2194.29 $\pm$ 115.59              | 18.57 $\pm$ 10.69                   | 1.79 $\pm$ 0.27              |
| 30 wk                   | 4  | 50.00 $\pm$ 0.00 <sup>^</sup>       | 26.75 $\pm$ 10.37              | 177.50 $\pm$ 166.76              | 75.00 $\pm$ 0.00 <sup>^</sup>     | 2801.25 $\pm$ 269.86              | 32.50 $\pm$ 2.89                    | 2.00 $\pm$ 0.00 <sup>^</sup> |
| 43 wk                   | 3  | 45.00 $\pm$ 5.00                    | 80.00 $\pm$ 27.84              | 98.33 $\pm$ 10.41                | 86.67 $\pm$ 16.07                 | 2558.33 $\pm$ 396.78              | 30.00 $\pm$ 0.00 <sup>^</sup>       | 1.50 $\pm$ 0.00 <sup>^</sup> |
| Treatment group 2: 5 wk | 10 | 48.60 $\pm$ 3.95                    | 39.67 $\pm$ 16.14 <sup>^</sup> | 166.00 $\pm$ 42.43 <sup>^</sup>  | 96.60 $\pm$ 11.73                 | 2298.30 $\pm$ 208.47              | 20.10 $\pm$ 4.01 <sup>C1*/T1*</sup> | 2.67 $\pm$ 0.26              |
| 11 wk                   | 7  | 54.00 $\pm$ 3.00 <sup>C2*/T1*</sup> | 32.57 $\pm$ 8.90               | 168.00 $\pm$ 92.01               | 92.57 $\pm$ 8.90                  | 2444.50 $\pm$ 166.64 <sup>^</sup> | 22.71 $\pm$ 2.93                    | 2.49 $\pm$ 0.29              |
| 19 wk                   | 7  | 43.57 $\pm$ 6.27                    | ND                             | 121.43 $\pm$ 62.70               | 75.00 $\pm$ 8.16                  | 2123.57 $\pm$ 314.48              | 16.43 $\pm$ 9.88                    | 1.86 $\pm$ 0.24              |
| 30 wk                   | 4  | 52.50 $\pm$ 2.89                    | 31.88 $\pm$ 9.44               | 203.75 $\pm$ 113.31              | 87.50 $\pm$ 8.66                  | 2660.00 $\pm$ 124.30              | 43.75 $\pm$ 4.79                    | 2.50 $\pm$ 0.00 <sup>^</sup> |
| 43 wk                   | 4  | 46.25 $\pm$ 6.29                    | 65.00 $\pm$ 30.00              | 96.25 $\pm$ 34.73                | 88.75 $\pm$ 7.50                  | 2225.00 $\pm$ 21.79 <sup>^</sup>  | 33.75 $\pm$ 4.79                    | 2.00 $\pm$ 0.00 <sup>^</sup> |
| Treatment group 3: 5 wk | 10 | 48.30 $\pm$ 4.11                    | 38.33 $\pm$ 12.53              | 192.00 $\pm$ 67.84               | 96.00 $\pm$ 15.81                 | 2403.60 $\pm$ 343.28              | 21.00 $\pm$ 4.69 <sup>C1*</sup>     | 2.47 $\pm$ 0.13 <sup>^</sup> |
| 11 wk                   | 7  | 51.00 $\pm$ 3.00                    | 38.57 $\pm$ 10.88              | 179.14 $\pm$ 76.54               | 93.00 $\pm$ 4.65 <sup>^</sup>     | 2658.00 $\pm$ 343.28              | 25.29 $\pm$ 5.15                    | 2.49 $\pm$ 0.33              |
| 19 wk                   | 7  | 41.43 $\pm$ 2.44                    | ND                             | 124.29 $\pm$ 33.59               | 81.43 $\pm$ 10.69                 | 2228.57 $\pm$ 261.88              | 16.43 $\pm$ 10.69                   | 2.00 $\pm$ 0.29              |
| 30 wk                   | 4  | 52.50 $\pm$ 2.89                    | 28.75 $\pm$ 8.33               | 156.25 $\pm$ 76.63               | 90.00 $\pm$ 9.13                  | 2912.50 $\pm$ 427.40              | 36.25 $\pm$ 10.31                   | 2.38 $\pm$ 0.48              |
| 43 wk                   | 4  | 45.00 $\pm$ 0.00 <sup>^</sup>       | 80.00 $\pm$ 27.99              | 135.00 $\pm$ 64.16               | 110.00 $\pm$ 26.46 <sup>C2*</sup> | 2690.00 $\pm$ 667.66              | 45.00 $\pm$ 0.00 <sup>^</sup>       | 2.00 $\pm$ 0.71              |

ND: Not determined. (Value was below detection limit.)
